# Supplementary material for: Continuous nitration of alcohols in a Freon flow
Source: Royal Society of Chemistry journal article supplement (doi:10.1039/c9re00035f), 2019-01-01

# Continuous Nitration of Alcohols in a Freon Flow

Mikhail N. Zharkov, Svetlana S. Arabadzhi, Ilya V. Kuchurov,  
and Sergei G. Zlotin\*

*†N.D. Zelinsky Institute of Organic Chemistry, Russian Academy of Sciences,  
Leninsky prosp. 47, 119991 Moscow, Russian Federation*

## Supporting Information

|    |                                                                                                                                          |    |
|----|------------------------------------------------------------------------------------------------------------------------------------------|----|
| 1. | General information                                                                                                                      | 2  |
| 2. | Experimental procedures                                                                                                                  | 4  |
| 3. | The reagents flow calculation                                                                                                            | 5  |
| 4. | Calculation of efficiency of batch and flow nitration of alcohols                                                                        | 8  |
| 5. | Physical and Spectral data (IR, <sup>1</sup> H NMR, <sup>13</sup> C NMR)<br>of compounds <b>2a</b> , <b>2b</b> , <b>2c</b> and <b>3c</b> | 9  |
| 6. | <sup>1</sup> H NMR and <sup>13</sup> C NMR spectra of compounds <b>2a</b> , <b>2b</b> , <b>2c</b> and <b>3c</b>                          | 10 |
| 7. | IR spectra of compounds <b>2a</b> , <b>2b</b> , <b>2c</b> and <b>3c</b>                                                                  | 24 |

## 1. General information

**Materials.** Alcohols **1a-c** were supplied by Acros Organics and Freon R134a (1,1,1,2-tetrafluoroethane) by Linde Gas (Russia). Dinitrogen pentoxide was synthesized by known method.<sup>1</sup>

**Instruments.** The <sup>1</sup>H, <sup>13</sup>C, and <sup>14</sup>N NMR spectra were recorded on a Bruker, AM-300 (300.13, 75.47 and 21.69 MHz, respectively). The FTIR spectra were obtained on a Simex FT-801 spectrometer.

The experiments were carried out on a specially designed installation for flow nitration processes (Figure 1). The main element of the system was the reactor unit, which consisted of two static mixers ( $M_1$  and  $M_2$ ) connected with a helix-shaped steel pipe with inner diameter of 0.03". The used pipes had lengths of 0.5, 1.0 or 2.0 m and volumes of 0.25, 0.5 or 1.0 cm<sup>3</sup> respectively. The reaction temperature was controlled with two sensors:  $TS_1$  located at  $M_1$  where the alcohol mixes with the nitrating agent and  $TS_2$  – at  $M_2$  where alkali solution is added. TFE feed was delivered from cylinder **I** or one of collection vessels **IX** by plunger pump **II** with integrated cooling Peltier thermoelectric modules. The DNP solution in TFE was preliminary prepared in auxiliary cell **III** ( $V = 50 \text{ cm}^3$ ) equipped with two look-through sapphire glasses. The prepared DNP solution and neat alcohol flows were continuously delivered to mixer  $M_1$  by syringe pumps **IV** and **V**, respectively. Both pumps provided constant flow rates with accuracy of  $10^{-5}$  mL/min and maximum deviation of 0.3%. An aqueous alkali flow was simultaneously delivered into mixer  $M_2$  by plunger pump **VI**. The operating pressure was maintained by the automatic back pressure regulator (ABPR) **VII** with working elements made of corrosion resistant materials (PTFE or stainless steel AISI316, etc.). The installation also comprised separator **VIII** for separation of gaseous TFE from liquid products, two condensation vessels (**IXa** and **IXb**) and adsorption tube **X** filled with molecular sieves 4A / granulated sodium hydroxide for purification of the recovered TFE before its reuse. All the elements were interconnected with stainless steel tubes and valves  $V_I$ .

12.

---

<sup>1</sup> Audrieth, L. F., Ed. Inorganic Syntheses, Vol. III; McGraw-Hill Book Company: New York, 1950.

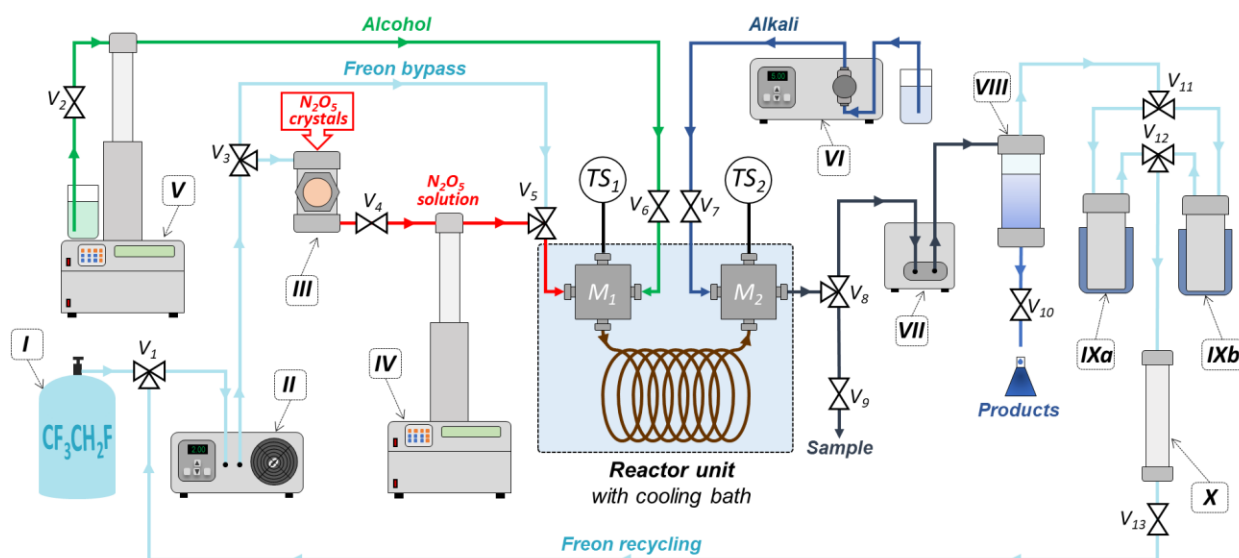

**Figure 1.** Flow nitration system: **I** – cylinder with TFE; **II** – fluid pump; **III** – auxiliary cell for  $\text{N}_2\text{O}_5$  solution; **IV** – syringe pump for pump for supplying  $\text{N}_2\text{O}_5$  solution; **V** – syringe pump for pump for supplying alcohol; **VI** – pump for supplying alkali solution; **VII** – automated back pressure regulator (ABPR); **VIII** – separator; **IXa** and **IXb** – parallel TFE collection vessels with cooling baths; **X** – sorption tube; **TS** – inlet (1) and outlet (2) temperature sensors;  $V_{1-12}$  – valves;  $M_1$  and  $M_2$  – mixers.

## 2. Experimental procedures

**Preparation of DNP solution in TFE.** DNP (5.25 g, 48.6 mmol) was placed into stainless steel cell ( $V = 50 \text{ cm}^3$ ) equipped with two look-through sapphire glasses. The cell was sealed, adjusted to  $20^\circ\text{C}$  and filled with liquid TFE at 10 bar ( $d = 1.228 \text{ g/cm}^3$ ). Thus, obtained homogeneous solution was transferred through the cell lower port into syringe pump **IV** cooled to  $10^\circ\text{C}$  by means of reverse piston movement and due to the temperature difference ( $\Delta T = 10^\circ\text{C}$ ) between the pump **IV** and the cell **III** (the optimal filling rate was 2.5 ml/min). Then, valve  $V_5$  was closed and the pressure inside pump **IV** risen to 10 bar by forward piston movement. Herewith, the DNP solution concentration was adjusted to  $1 \text{ mol/L} \pm 2\%$ .

**Flow nitration (general procedure).** Before starting the flow process, the required flow rate and operating pressure values (see Tables 1 and 2) must be carefully set on control panels of pumps **IV – VI** and ABPR **VII**, respectively). Valve  $V_8$  was opened and the installation was filled with liquid TFE through the FREON BYPASS line by means of pump **II**. Then, pumps **IV – VI** were switched on and valves  $V_5 – V_7$  were opened. The nitration was quenched in mixer **M<sub>2</sub>** by 2M aqueous NaOH flow (for detailed flow rates see Supporting Information). Then the resulting mixture was transferred through ABPR **VII** into separator **VIII**. The gas phase (TFE at 3 bar) was removed from the separator through the upper port to vessel **IXa** where it condensed at  $0^\circ\text{C}$ . Upon filling vessel **IXa** with liquid TFE, valve  $V_{11}$  was turned to redirect the TFE flow to parallel condensation vessel **IXb**. Then, vessel **IXa** was warmed up to an ambient temperature, gaseous TFE was passed through the adsorption tube **X** to remove aqueous and other impurities and returned to fluid pump **II** for recycling. The liquid phase was periodically poured out of separator **VIII** through the lower port with valve  $V_{10}$  to a flask. The organic phase was separated from aqueous solution, washed twice with distilled water to afford nearly pure nitroester **2**

**Analysis.** To control stability of the flow nitration parameters, two analytical samples were taken in each experiment ( $\sim 5$  min after the flow start and  $\sim 5$  min before pumps **IV-VI** turning off). On this purpose, valve  $V_8$  was opened and a micro-sample of the reaction mixture was passed to the analytical capillary ( $l = 0.2 \text{ m}$ ,  $V = 0.1 \text{ mL}$ ). Then valve  $V_8$  was closed and the sample was transferred to a flask at ambient pressure by opening valve  $V_9$ . The analytic capillary volume needs to be at least several times smaller than the helix-shaped tube to avoid interfering with ABPR **VII** operation and retain constant pressure in the system. Therefore, the described procedure must be repeated 5-10 times (depending on the substrate) to collect sufficient for analysis sample amount. The combined sample was dried under

reduced pressure, then acetone-D<sub>6</sub> is added, solid inorganic salts were separated, and the solution was analyzed with <sup>1</sup>H NMR to determine conversion of alcohol **1** and selectivity of the process.

### 3. The reagents flow calculation

For example, in the Experimental 1 (Table 1) at reactor tube length 2 [m] (volume 1 [cm<sup>3</sup>]) and the chosen reagents contact time 100 [s] the sum of alcohol  $F_{alc}^V$  and N<sub>2</sub>O<sub>5</sub> solution  $F_{nitr}^V$  volume flow rates is 0.01 [cm<sup>3</sup>/s]. Also the molar ratio of the reactants is  $F_{alc}^n:F_{nitr}^n = 1:1.5$ , the alcohol density is  $d_{alk} = 0.833$  [g/cm<sup>3</sup>] and the N<sub>2</sub>O<sub>5</sub> solution concentration is  $C_{nitr} = 1$  [mol/L] = 10<sup>-3</sup>[mol/cm<sup>3</sup>]. Then the molar flow rates of the reactants are:

$$F_{nitr}^n = C_{nitr} \cdot F_{nitr}^V,$$

$$F_{alc}^n = \frac{F_{alc}^m}{M_{alc}} = \frac{d_{alk} \cdot F_{alc}^V}{M_{alc}},$$

where  $F_{alc}^m$  – the alcohol mass flow rate;  $M_{alc}$  – the alcohol molar mass. In accordance with molar ratio of the reactants:

$$1.5 \frac{d_{alk} \cdot F_{alc}^V}{M_{alc}} = (C_{nitr} \cdot F_{nitr}^V),$$

$$F_{alc}^V = \frac{C_{nitr} \cdot M_{alc}}{1.5 \cdot d_{alk}} \cdot F_{nitr}^V.$$

By applying the values:

$$F_{alc}^V = \frac{10^{-3} \cdot 130}{1.5 \cdot 0.833} \cdot F_{nitr}^V = 0.104 \cdot F_{nitr}^V.$$

The flow rates of each reactant  $F_{alc}^V$  and  $F_{nitr}^V$  may be found using the following rate balance equation:

$$0.104 \cdot F_{nitr}^V + F_{nitr}^V = 0.01 \text{ [cm}^3/\text{s]},$$

$$F_{nitr}^V = 0.009058 \text{ [cm}^3/\text{s]} = \mathbf{0.544 \text{ [cm}^3/\text{min}]}, \text{ and}$$

$$F_{alc}^V = 0.104 \cdot 0.009058 \text{ [cm}^3/\text{s]} = 0.000942 \text{ [cm}^3/\text{s]} = \mathbf{0.0565 \text{ [cm}^3/\text{min}]}$$

**Table 1.** Flow nitration of 2-ethylhexanol (**1a**) with DNP in liquid TFE.<sup>a</sup>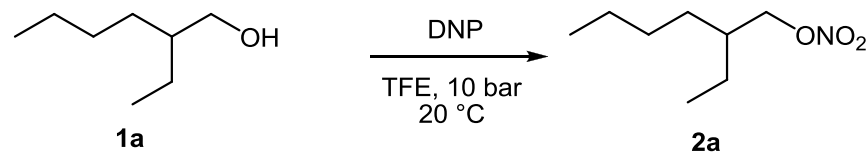

| Entry          | Alcohol <b>1a</b> rate |        |        | <b>1a</b> /DNP/NaOH molar ratio | DNP solution rate |        |        | Alkali solution rate |        | Reactor length (volume), m (cm <sup>3</sup> ) | Residence time, s | Conversion, % <sup>b</sup> |
|----------------|------------------------|--------|--------|---------------------------------|-------------------|--------|--------|----------------------|--------|-----------------------------------------------|-------------------|----------------------------|
|                | mmol/min               | mg/min | mL/min |                                 | mmol/min          | mg/min | mL/min | mmol/min             | mL/min |                                               |                   |                            |
| 1              | 0.362                  | 47.1   | 0.0565 | 1 : 1.5 : 2.0                   | 0.544             | 58.7   | 0.5435 | 1.087                | 0.54   | 2 (1)                                         | 100               | 100                        |
| 2              | 0.725                  | 94.2   | 0.1131 | 1 : 1.5 : 2.0                   | 1.087             | 117.4  | 1.0870 | 2.174                | 1.09   | 2 (1)                                         | 50                | 100                        |
| 3              | 1.449                  | 188.4  | 0.2262 | 1 : 1.5 : 2.0                   | 2.174             | 234.8  | 2.1740 | 4.348                | 2.17   | 2 (1)                                         | 25                | 100                        |
| 4              | 0.478                  | 62.1   | 0.0746 | 1 : 1.1 : 1.2                   | 0.526             | 56.8   | 0.5256 | 0.631                | 0.32   | 2 (1)                                         | 100               | 99                         |
| 5              | 0.478                  | 62.1   | 0.0746 | 1 : 1.1 : 1.2                   | 0.526             | 56.8   | 0.5256 | 0.631                | 0.32   | 1 (0.5)                                       | 50                | 93                         |
| 6              | 0.478                  | 62.1   | 0.0746 | 1 : 1.1 : 1.2                   | 0.526             | 56.8   | 0.5256 | 0.631                | 0.32   | 0.5 (0.25)                                    | 25                | 90                         |
| 7              | 0.956                  | 124.2  | 0.1491 | 1 : 1.1 : 1.2                   | 1.051             | 113.5  | 1.0512 | 1.261                | 0.63   | 2 (1)                                         | 50                | 98 <sup>c</sup>            |
| 8 <sup>d</sup> | 0.510                  | 66.2   | 0.0795 | 1 : 1.1 : 1.2                   | 0.561             | 60.5   | 1.1210 | 0.673                | 0.34   | 2 (1)                                         | 50                | 99                         |
| 9              | 0.519                  | 67.5   | 0.0810 | 1 : 1.0 : 1.0                   | 0.519             | 56.1   | 0.5190 | 0.519                | 0.26   | 2 (1)                                         | 100               | 90                         |
| 10             | 0.519                  | 67.5   | 0.0810 | 1 : 1.0 : 1.0                   | 0.519             | 56.1   | 0.5190 | 0.519                | 0.26   | 1 (0.5)                                       | 50                | 87                         |

<sup>a</sup> the reactions were performed at 10 bar, 20 °C and DNP concentration 1 mol/L;

<sup>b</sup> the conversion was determined by <sup>1</sup>H NMR spectroscopy;

<sup>c</sup> isolated yield of **2a** was 4.72 g per 30 min (94%);

<sup>d</sup> DNP concentration was 0.5 mol/L.

**Table 2.** Flow nitration of diethylene glycol (**1b**) and glycerin (**1c**) with DNP in liquid TFE.<sup>a</sup>

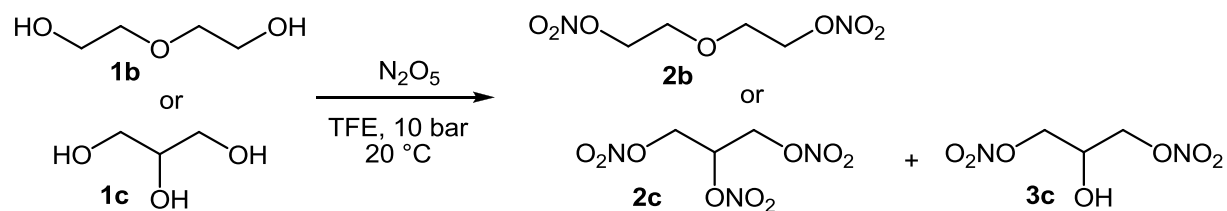

| Entry | Alcohol   | Substrate 1 rate |        |        | 1a/DNP/NaOH molar ratio | DNP solution rate |        |        | Alkali solution rate |        | Reactor length (volume), m (cm <sup>3</sup> ) | Residence time, s | Conversion, % <sup>b</sup> |
|-------|-----------|------------------|--------|--------|-------------------------|-------------------|--------|--------|----------------------|--------|-----------------------------------------------|-------------------|----------------------------|
|       |           | mmol/min         | mg/min | mL/min |                         | mmol/min          | mg/min | mL/min | mmol/min             | mL/min |                                               |                   |                            |
| 1     | <b>1b</b> | 0.523            | 55.5   | 0.0496 | 1 : 2.2 : 2.4           | 1.151             | 124.3  | 1.1510 | 2.762                | 1.38   | 2 (1)                                         | 50                | 99 <sup>c</sup>            |
| 2     |           | 0.523            | 55.5   | 0.0496 | 1 : 2.2 : 2.4           | 1.151             | 124.3  | 1.1510 | 2.762                | 1.38   | 0.5 (0.25)                                    | 13                | 90                         |
| 3     | <b>1c</b> | 0.356            | 32.8   | 0.0260 | 1 : 3.3 : 2.9           | 1.174             | 126.8  | 1.1740 | 3.405                | 1.70   | 2 (1)                                         | 50                | 96 (75:25) <sup>d</sup>    |
| 4     |           | 0.712            | 65.5   | 0.0520 | 1 : 3.3 : 2.9           | 2.348             | 253.6  | 2.3480 | 6.809                | 3.40   | 2 (1)                                         | 25                | 99 (91:9) <sup>d</sup>     |
| 5     |           | 1.067            | 98.3   | 0.0780 | 1 : 3.3 : 2.9           | 3.522             | 380.4  | 3.5220 | 10.214               | 5.11   | 2 (1)                                         | 17                | 100 (96:4) <sup>d,e</sup>  |
| 6     |           | 1.067            | 98.3   | 0.0780 | 1 : 3.3 : 2.9           | 3.522             | 380.4  | 3.5220 | 10.214               | 5.11   | 0.5 (0.25)                                    | 4                 | 99 (91:9) <sup>d</sup>     |
| 7     |           | 0.975            | 89.8   | 0.0713 | 1 : 3.6 : 3.4           | 3.510             | 379.1  | 3.5100 | 11.934               | 5.97   | 0.5 (0.25)                                    | 4                 | 99 (94:6) <sup>d</sup>     |

<sup>a</sup> the reactions were performed at 10 bar, 20 °C and DNP concentration 1 mol/L;

<sup>b</sup> the conversion was determined by <sup>1</sup>H NMR spectroscopy;

<sup>c</sup> isolated yield of **2b** was 2.92 g per 30 min (95%);

<sup>d</sup> **2c** / **3c** ratio (selectivity);

<sup>e</sup> isolated yield of **2c** was 2.18 g per 10 min (90%).

#### 4. Calculation of efficiency of batch and flow nitration of alcohols

The specific performances ( $P_s$ ) of 2,2'-oxybis(ethane-2,1-diyl) dinitrate (**2b**) nitration processes in TFE medium were calculated to compare the efficacy of batch and flow modes.

The batch nitration of diethylene glycol (**1b**) in TFE medium was carried out using alcohol (0.85 g, 8.0 mmol) at 0–10 °C for 30 min in 22 cm<sup>3</sup> steel autoclave.<sup>2</sup> The yield of **2b** was 1.55 g (99%).

$$P_s = \frac{m_{es}}{t_r \cdot V_a},$$

where  $m_{es}$  – mass of estery,  $V_a$  – autoclave volume,  $t_r$  – reaction time.

$$P_{sb} = \frac{1.55 \text{ g}}{30 \text{ min} \cdot 22 \text{ cm}^3} = 2.35 \cdot 10^{-3} \frac{\text{g}}{\text{min} \cdot \text{cm}^3}$$

In the flow nitration of diethylene glycol (**1b**) (0.523 mmol/min, 55.5 · 10<sup>-3</sup> g/min, 0.0496 mL/min) in reactor of 2 m length and 1 cm<sup>3</sup> volume the isolated yield of **2b** was 2.92 g per 30 min (95%) (Table 2, entry 1).

$$P_{sf} = \frac{2.92 \text{ g}}{30 \text{ min} \cdot 1 \text{ cm}^3} = 97.33 \cdot 10^{-3} \frac{\text{g}}{\text{min} \cdot \text{cm}^3}$$
$$\frac{P_{sf}}{P_{sb}} = \frac{97.33 \cdot 10^{-3}}{2.35 \cdot 10^{-3}} = 41.4$$

The flow nitration of diethylene glycol (**1b**) is 41 times more effective than its batch analog.

For propane-1,2,3-triyl trinitrate (nitroglycerin) (**2c**) with the yields 1.79 g (99%) in batch nitration<sup>2</sup> and 2.18 g per 10 min (90%) in flow one (Table 2, entry 5) specific performances equal

$$P_{sb} = \frac{1.79 \text{ g}}{30 \text{ min} \cdot 22 \text{ cm}^3} = 2.71 \cdot 10^{-3} \frac{\text{g}}{\text{min} \cdot \text{cm}^3}$$
$$P_{sf} = \frac{2.18 \text{ g}}{10 \text{ min} \cdot 1 \text{ cm}^3} = 2.18 \cdot 10^{-1} \frac{\text{g}}{\text{min} \cdot \text{cm}^3}$$
$$\frac{P_{sf}}{P_{sb}} = \frac{2.18 \cdot 10^{-1}}{2.71 \cdot 10^{-3}} = 80.1$$

The flow nitration of glycerol (**1c**) is 80 times more effective than its batch analog.

<sup>2</sup> Kuchurov, I.V.; Arabadzhi, S.S.; Zharkov, M.N.; Fershtat, L.L.; Zlotin, S.G. *ACS Sustainable Chem. Eng.*, **2018**, 6(2), 2535–2540.



## 5. Physical and Spectral data (IR, <sup>1</sup>H NMR, <sup>13</sup>CNMR) of compounds 2a, 2b, 2c and 3c

2-Ethylhexyl nitrate (**2a**): b.p. 88 °C / 8 Torr;  $n_D^{20}$  1.4305; FTIR  $\nu$  1625 (NO<sub>2</sub><sup>as</sup>), 1275 (NO<sub>2</sub><sup>s</sup>) cm<sup>-1</sup>; <sup>1</sup>H NMR (CD<sub>3</sub>COCD<sub>3</sub>, 300 MHz)  $\delta$  4.46 (d, 2 H, CH<sub>2</sub>ONO<sub>2</sub>,  $J$  = 5.9 Hz), 1.73 (sep, 1 H, CH(CH<sub>2</sub>)<sub>3</sub>,  $J$  = 6.1 Hz); 1.48-1.31 (m, 8 H, 4 × CH<sub>2</sub>); 0.96-0.88 (m, 6 H, 2 × CH<sub>3</sub>); <sup>13</sup>C NMR (CD<sub>3</sub>COCD<sub>3</sub>, 75 MHz)  $\delta$  76.9, 38.6, 31.1, 29.6, 24.5, 23.7, 14.4, 11.3; <sup>14</sup>N NMR (CD<sub>3</sub>COCD<sub>3</sub>, 21.69 MHz)  $\delta$ : -39.1 (ONO<sub>2</sub>).

2,2'-Oxybis(ethane-2,1-diyl) dinitrate (**2b**): b.p. 140 °C / 7 Torr (Lit.<sup>3</sup> 130 °C / 4 Torr);  $n_D^{20}$  1.4522 (Lit.<sup>3</sup>  $n_D^{20}$  1.4518); FTIR  $\nu$  1620 (NO<sub>2</sub><sup>as</sup>), 1272 (NO<sub>2</sub><sup>s</sup>) cm<sup>-1</sup>; <sup>1</sup>H NMR (CD<sub>3</sub>COCD<sub>3</sub>, 300 MHz)  $\delta$  4.72 (t, 4 H, CH<sub>2</sub>ONO<sub>2</sub>,  $J$  = 4.4 Hz), 3.85 (t, 4 H, CH<sub>2</sub>O,  $J$  = 4.5 Hz); <sup>13</sup>C NMR (CD<sub>3</sub>COCD<sub>3</sub>, 75 MHz)  $\delta$  72.1, 66.5; <sup>14</sup>N NMR (CD<sub>3</sub>COCD<sub>3</sub>, 21.69 MHz)  $\delta$ : -41.1 (ONO<sub>2</sub>).

Propane-1,2,3-triyl trinitrate (**2c**): b.p. 86-87 °C / 0.16 Torr (Lit.<sup>4</sup> 108-110 °C / 1 Torr];  $n_D^{20}$  1.4727 (Lit.<sup>4</sup>  $n_D^{20}$  1.473); FTIR  $\nu$  1632 (NO<sub>2</sub><sup>as</sup>), 1265 (NO<sub>2</sub><sup>s</sup>) cm<sup>-1</sup>; <sup>1</sup>H NMR (CD<sub>3</sub>COCD<sub>3</sub>, 300 MHz)  $\delta$  5.96-5.89 (m, 1 H, CHONO<sub>2</sub>), 5.16 (dd, 2 H, CH<sub>2</sub>ONO<sub>2</sub>,  $J_1$  = 13.0 Hz,  $J_2$  = 3.3 Hz); 4.98 (dd, 2 H, CH<sub>2</sub>ONO<sub>2</sub>,  $J_1$  = 13.0 Hz,  $J_2$  = 6.1 Hz); <sup>13</sup>C NMR (CD<sub>3</sub>COCD<sub>3</sub>, 75 MHz)  $\delta$  75.9, 69.2; <sup>14</sup>N NMR (CD<sub>3</sub>COCD<sub>3</sub>, 21.69 MHz)  $\delta$ : -43.4 (ONO<sub>2</sub>).

2-Hydroxypropane-1,3-diyl dinitrate (**3c**):

b.p. 78 °C / 0.14 Torr (Lit.<sup>5</sup> 115-116 °C / 0.6 Torr];  $n_D^{20}$  1.4710 (Lit.<sup>5</sup>  $n_D^{20}$  1.4715); FTIR  $\nu$  1623 (NO<sub>2</sub><sup>as</sup>), 1271 (NO<sub>2</sub><sup>s</sup>) cm<sup>-1</sup>; <sup>1</sup>H NMR (CDCl<sub>3</sub>, 300 MHz)  $\delta$  4.63 (dd, 2 H, CH<sub>2</sub>ONO<sub>2</sub>,  $J_1$  = 11.6 Hz,  $J_2$  = 4.5 Hz); 4.56 (dd, 2 H, CH<sub>2</sub>ONO<sub>2</sub>,  $J_1$  = 11.7 Hz,  $J_2$  = 6.0 Hz), 4.37-4.28 (m, 1 H, CH<sub>2</sub>CHCH<sub>2</sub>), 2.53 (br s, 1 H, CHOH); <sup>1</sup>H NMR (CD<sub>3</sub>COCD<sub>3</sub>, 300 MHz)  $\delta$  4.74 (dd, 2 H, CH<sub>2</sub>ONO<sub>2</sub>,  $J_1$  = 11.2 Hz,  $J_2$  = 4.3 Hz); 4.64 (dd, 2 H, CH<sub>2</sub>ONO<sub>2</sub>,  $J_1$  = 11.5 Hz,  $J_2$  = 6.3 Hz),  $\delta$  4.42-4.31 (m, 1 H, CH<sub>2</sub>CHCH<sub>2</sub>); <sup>13</sup>C NMR (CD<sub>3</sub>COCD<sub>3</sub>, 75 MHz)  $\delta$  73.5, 64.7; <sup>14</sup>N NMR (CD<sub>3</sub>COCD<sub>3</sub>, 21.69 MHz)  $\delta$  -43.4 (ONO<sub>2</sub>); HRMS (ESI+)  $m/z$  [M+Na]: calcd. 205.0067, found 205.0070.

<sup>3</sup> Urbański, T.; Witanowski, M. *Trans. Faraday Soc.* **1963**, 59, 1039–1045.

<sup>4</sup> Fedorov, B. S.; Eremenko, L. T. *Russ. Chem. Bull.* **1997**, 46(5), 1022–1023.

<sup>5</sup> Dunstan, I.; Griffiths, J. V.; Harvey, S. A. *J. Chem. Soc.*, **1965**, 1319–1324.

## 6. $^1\text{H}$ NMR and $^{13}\text{C}$ NMR spectra of compounds 2a, 2b, 2c and 3c

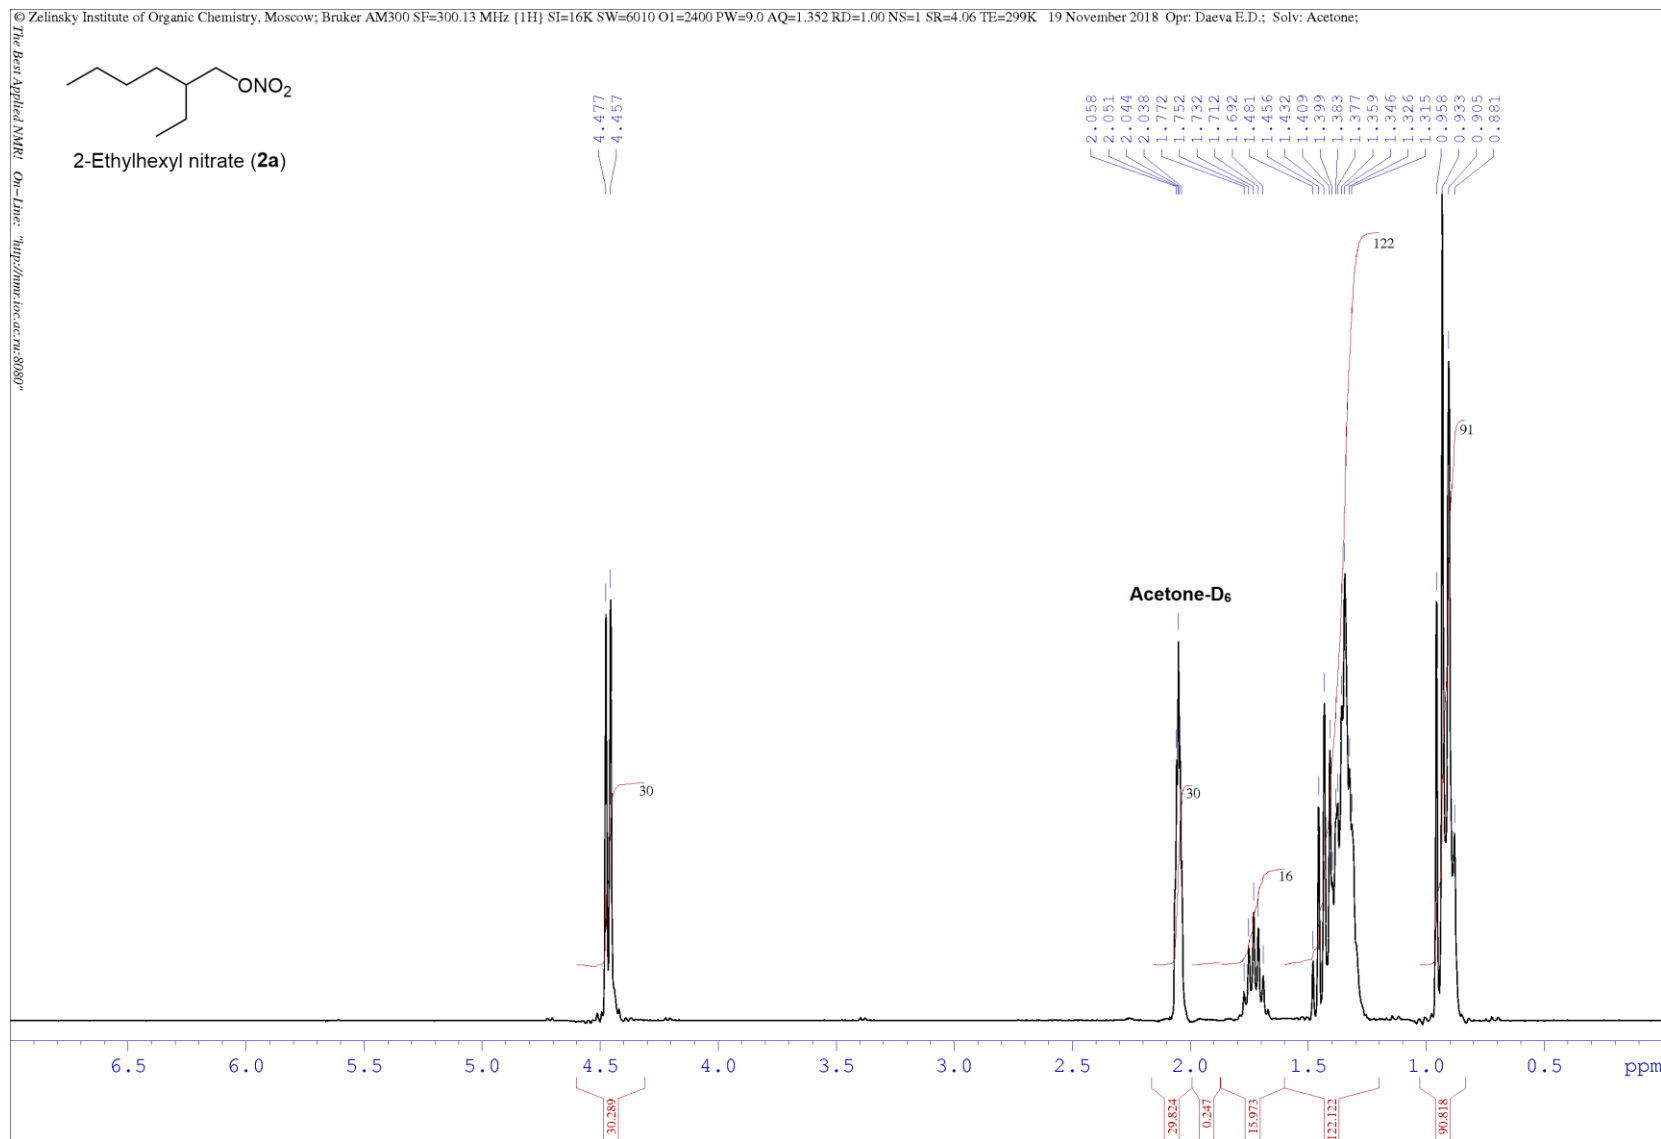

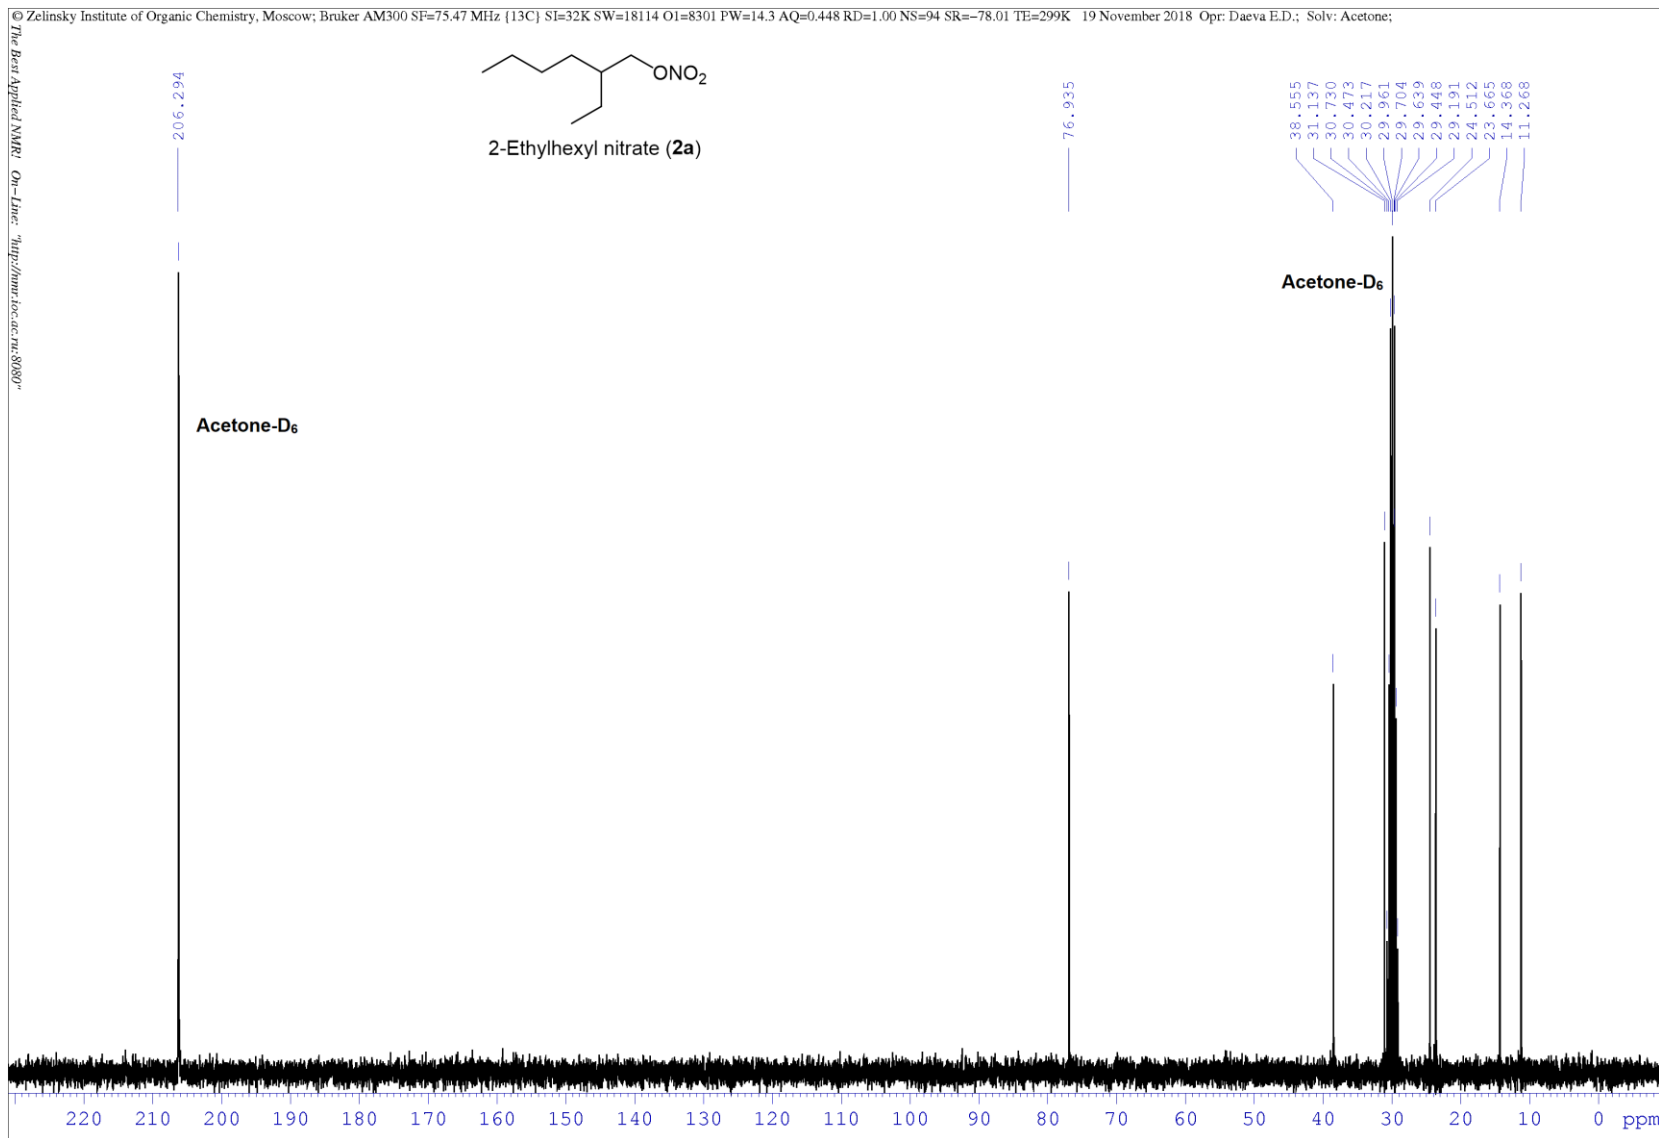

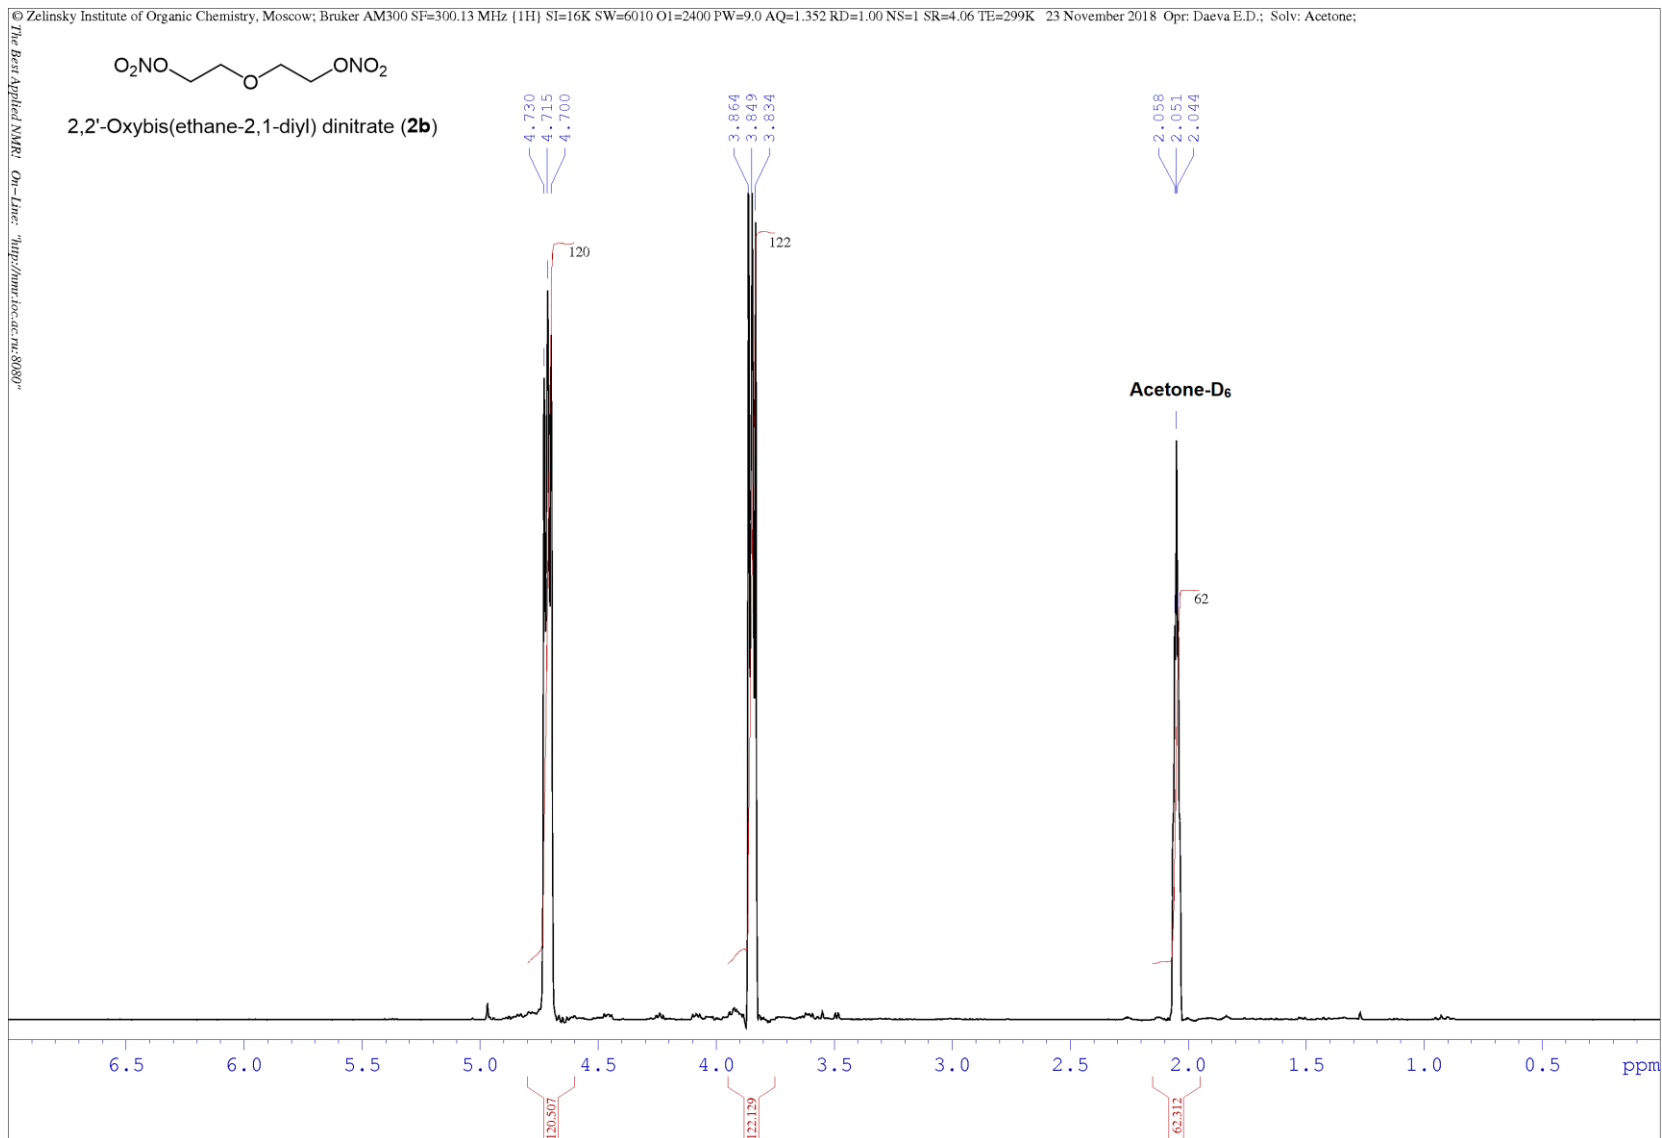

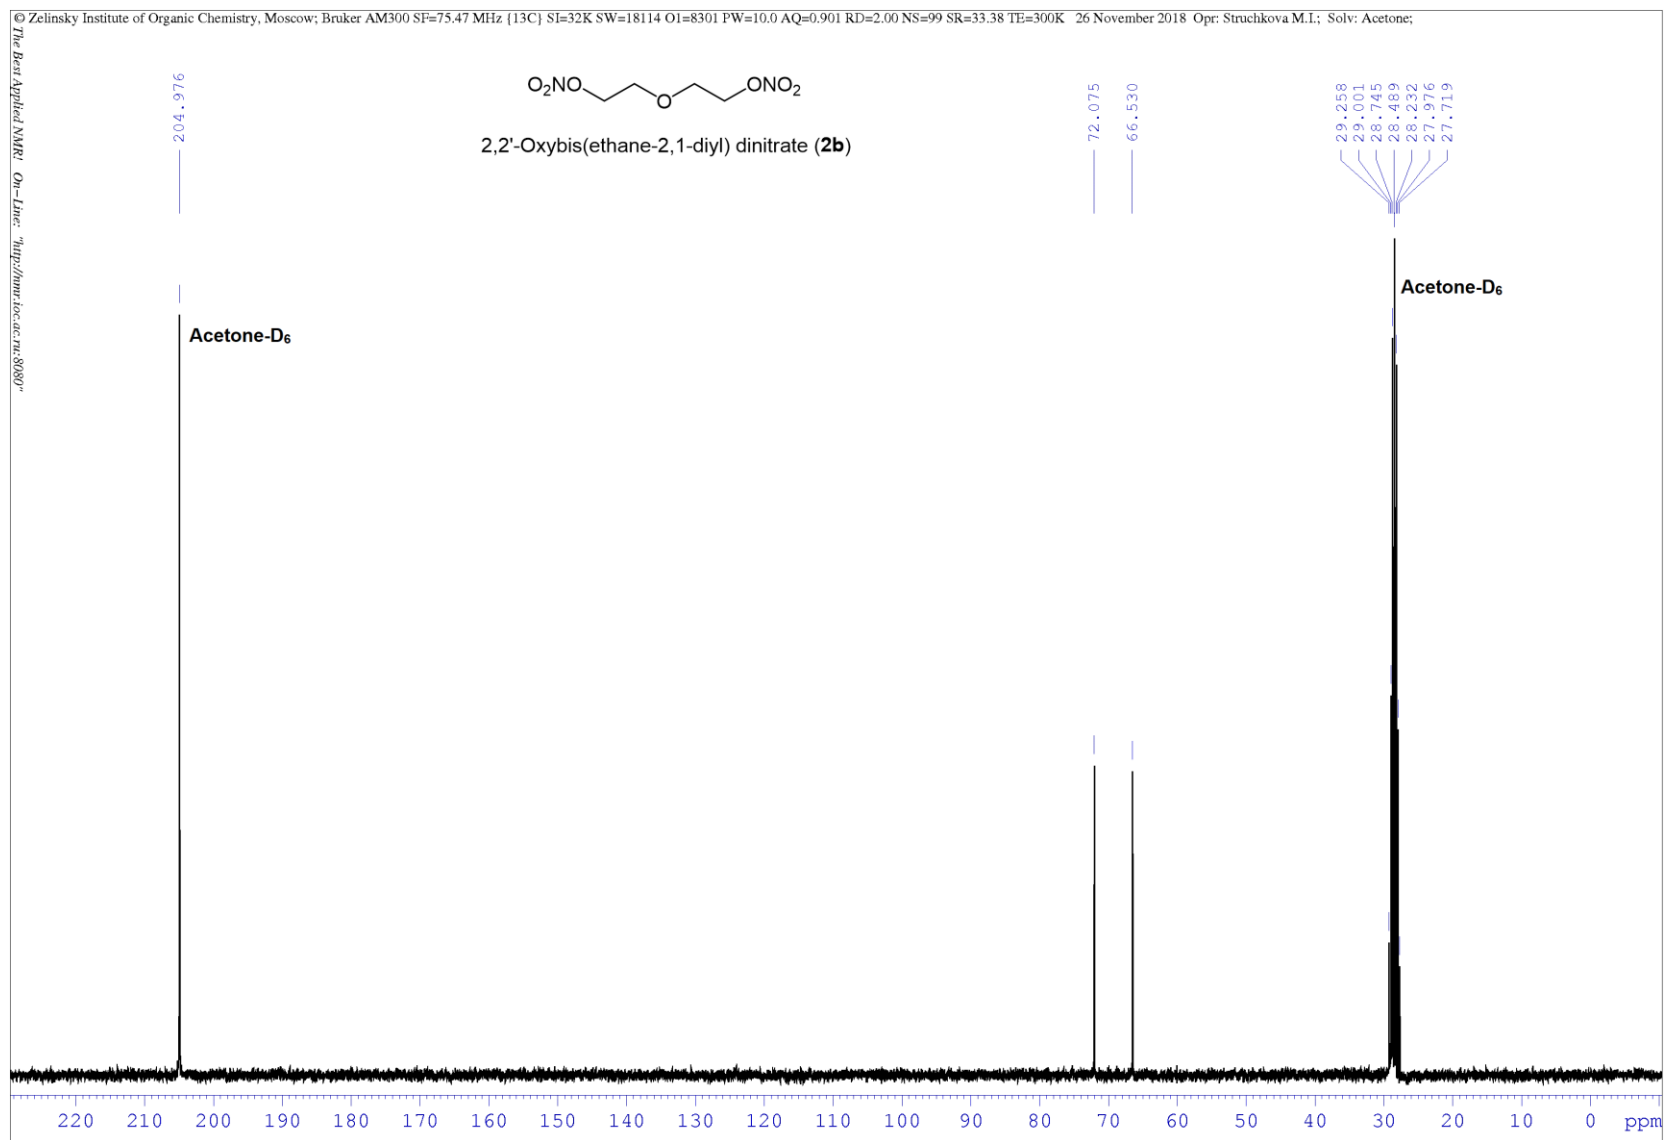

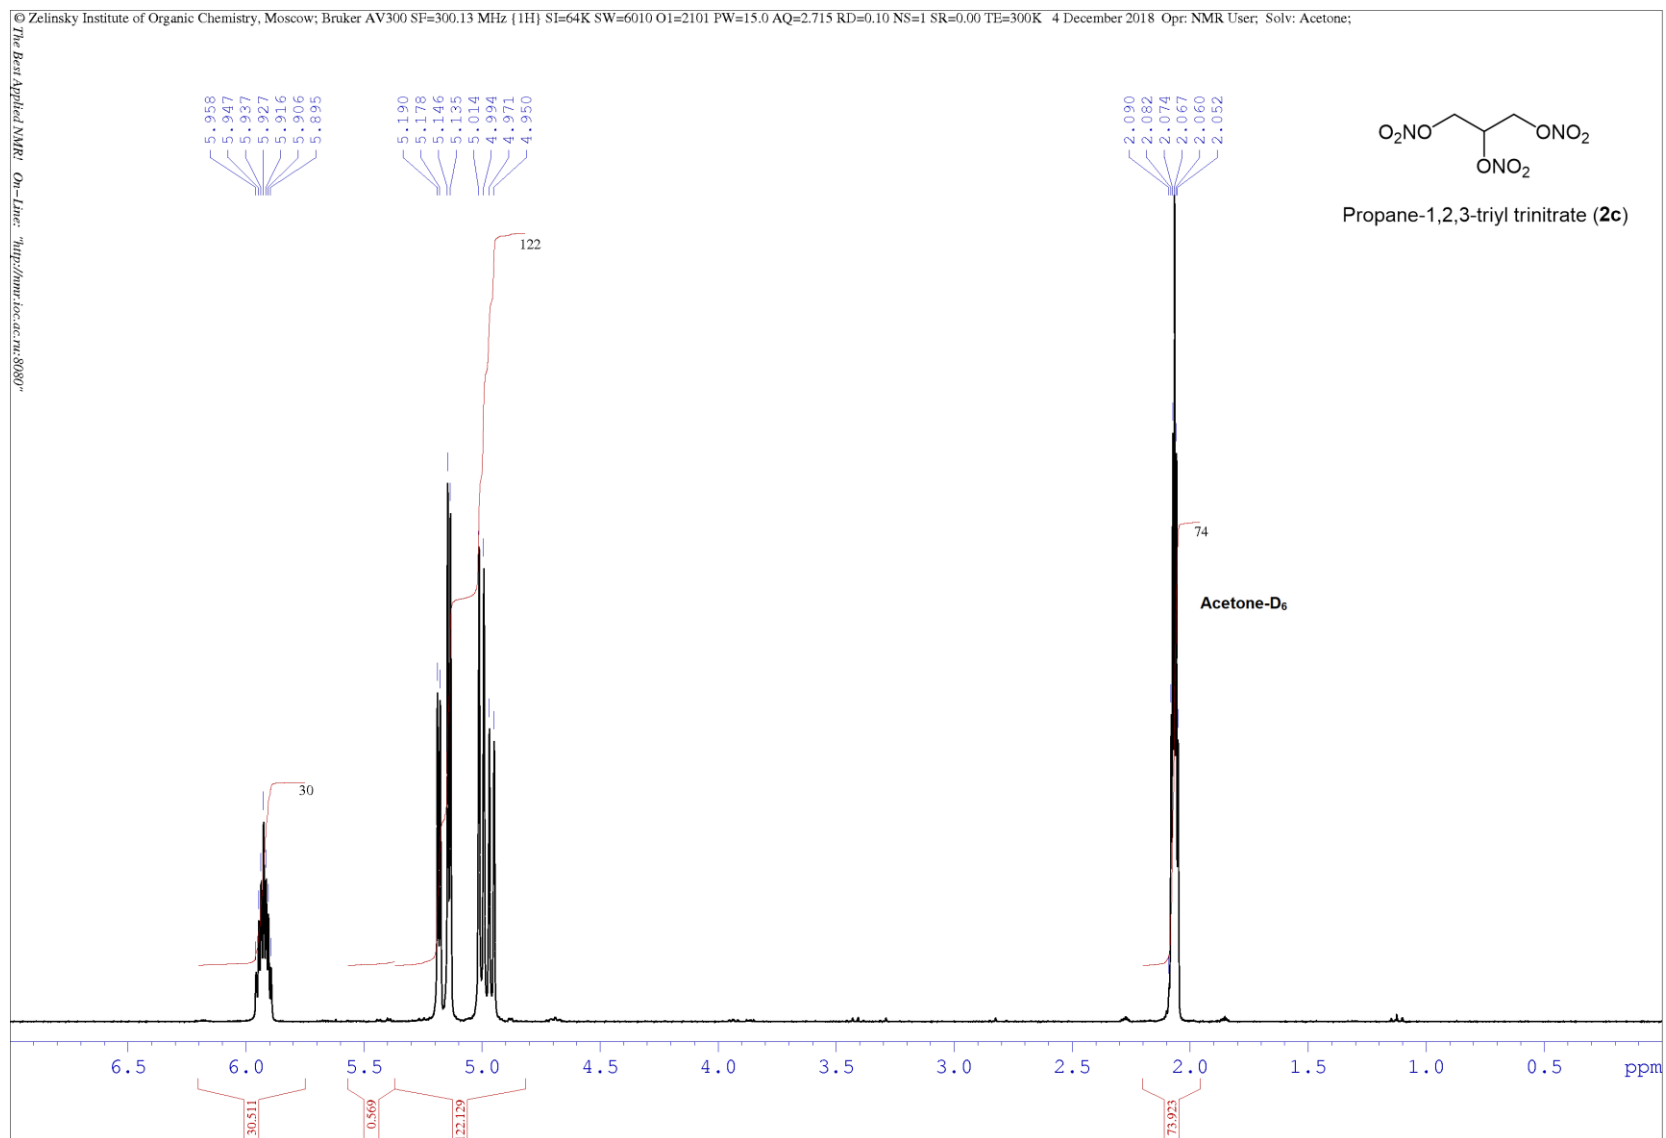

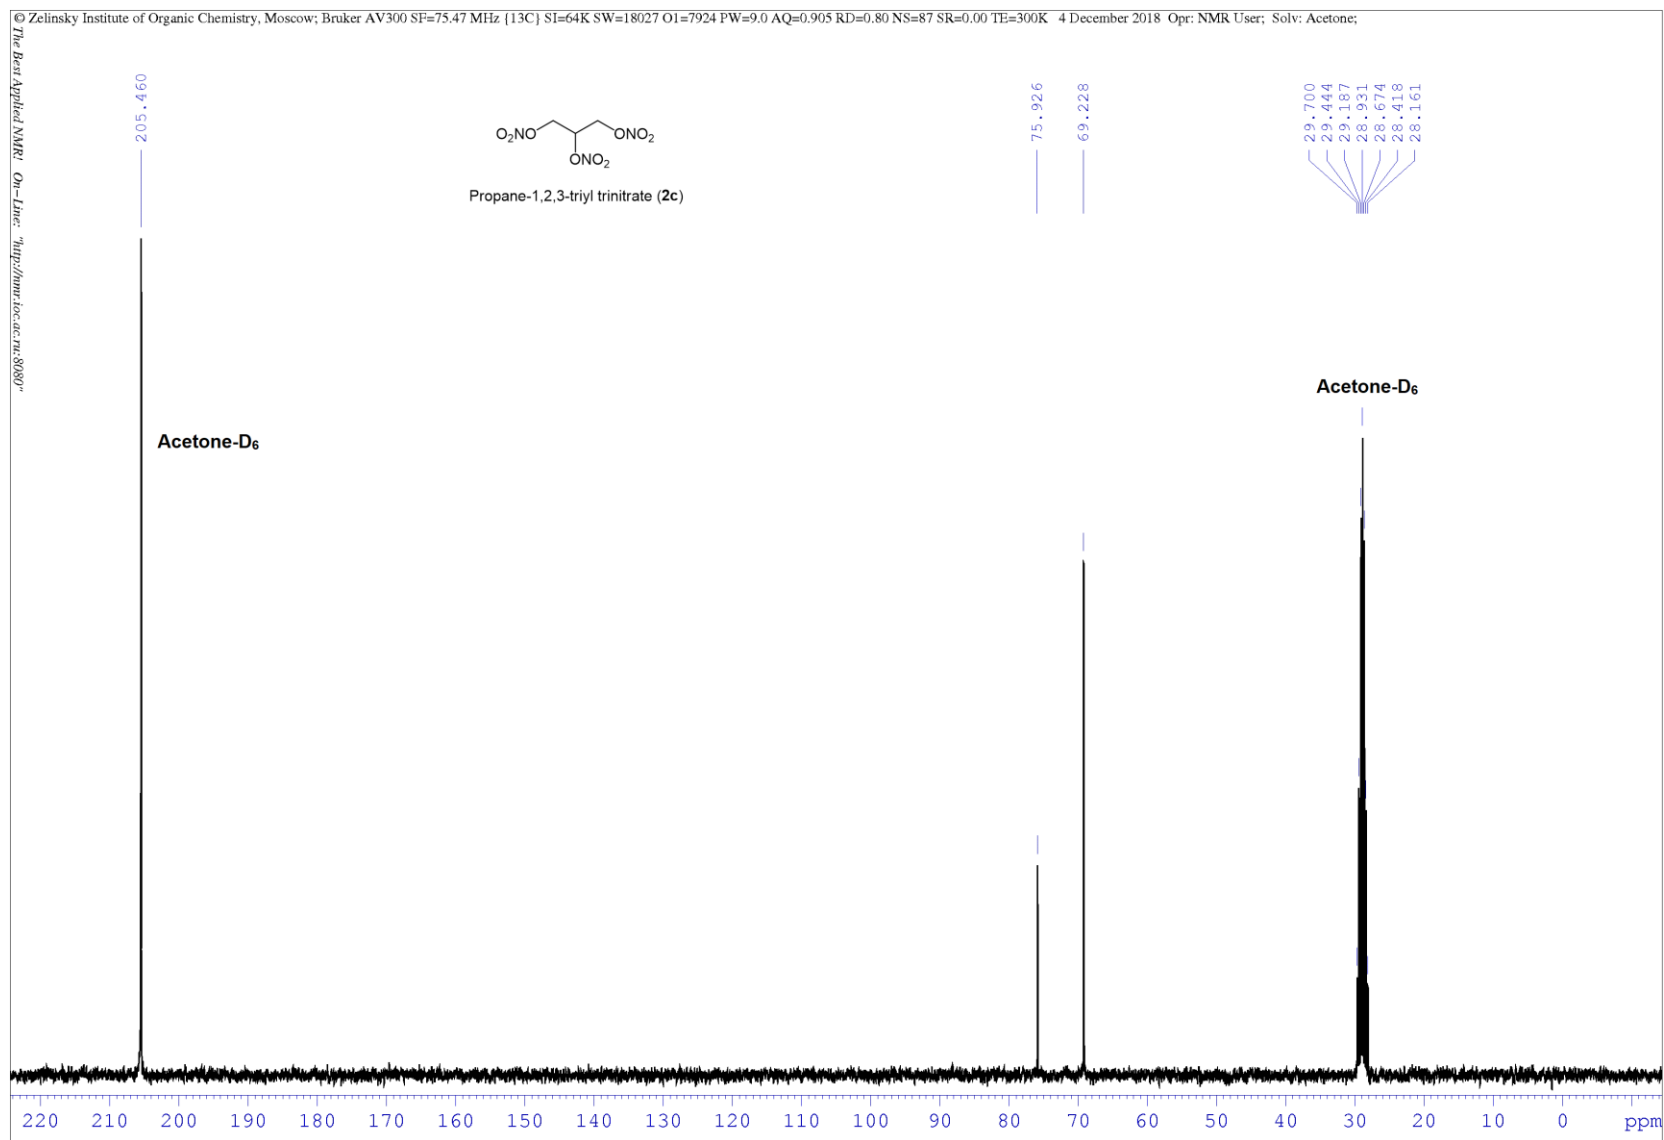

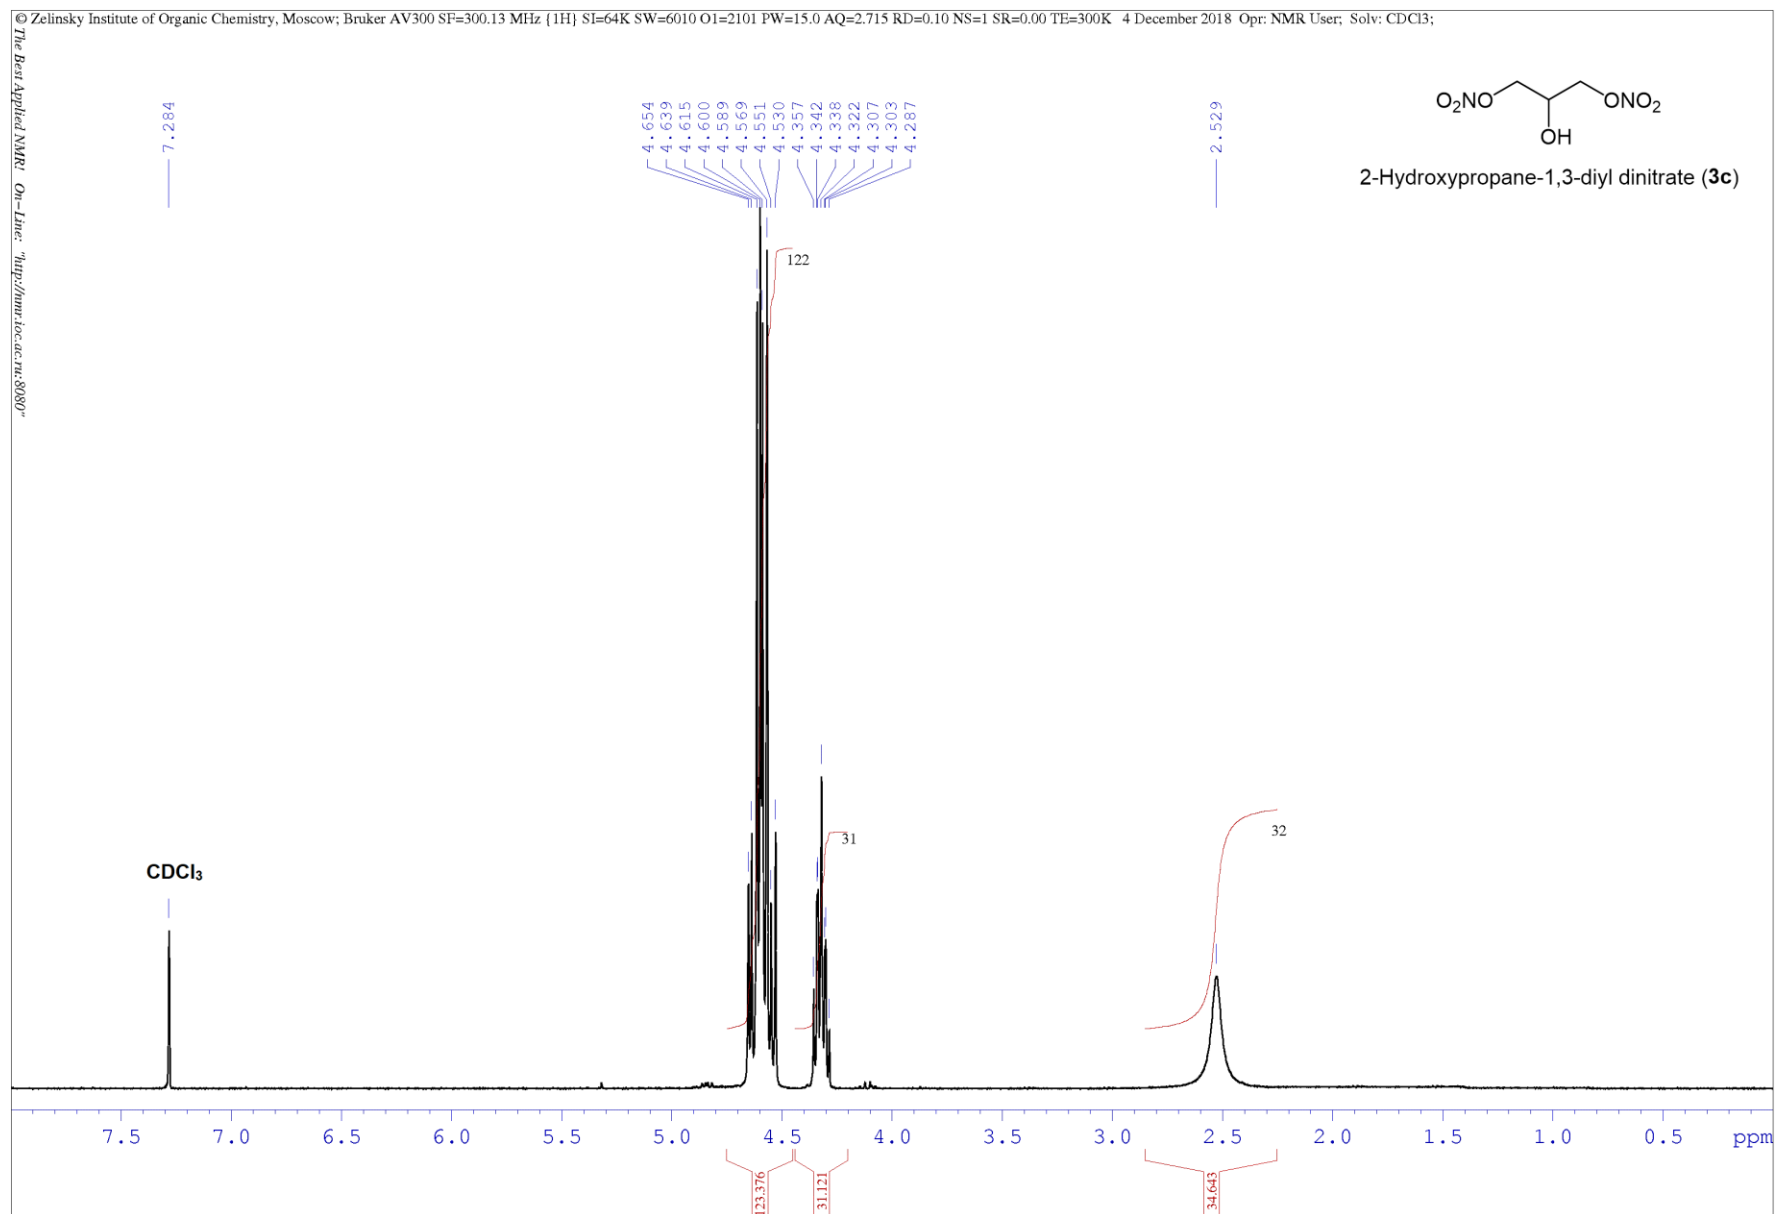



The Best Applied NMR On-Line: <http://nmr.ioc.ac.ru/8080/>

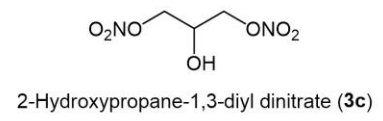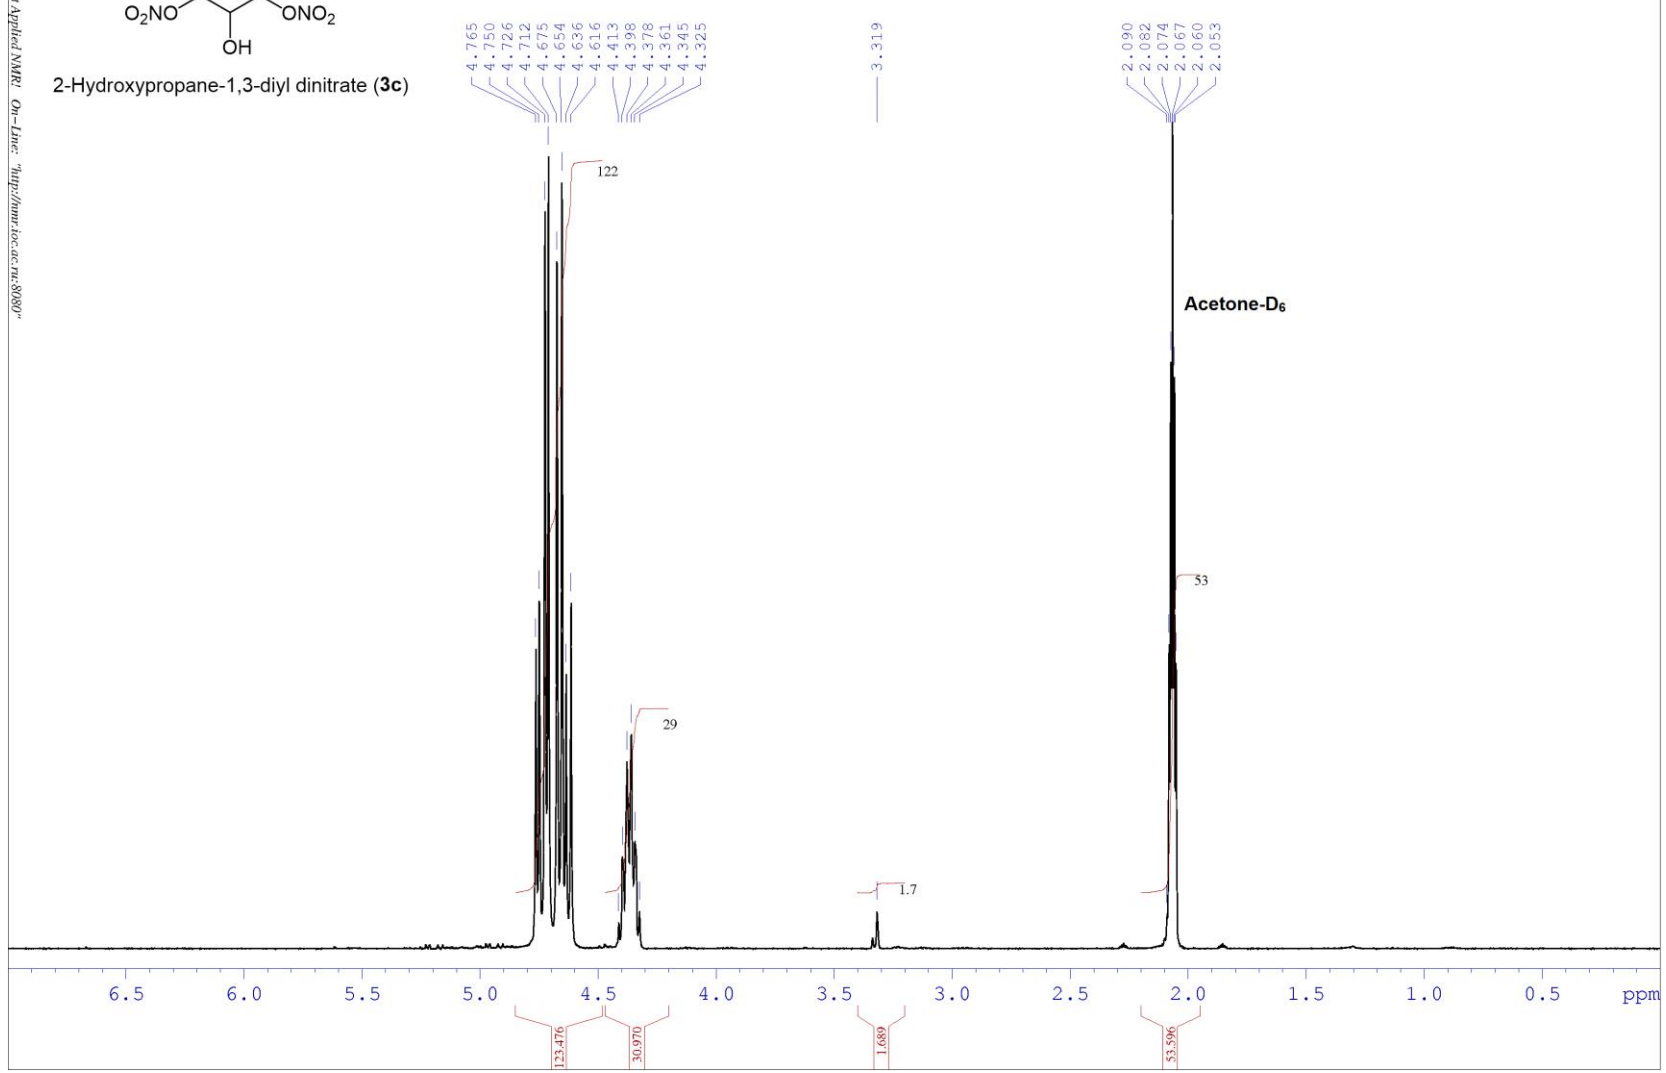

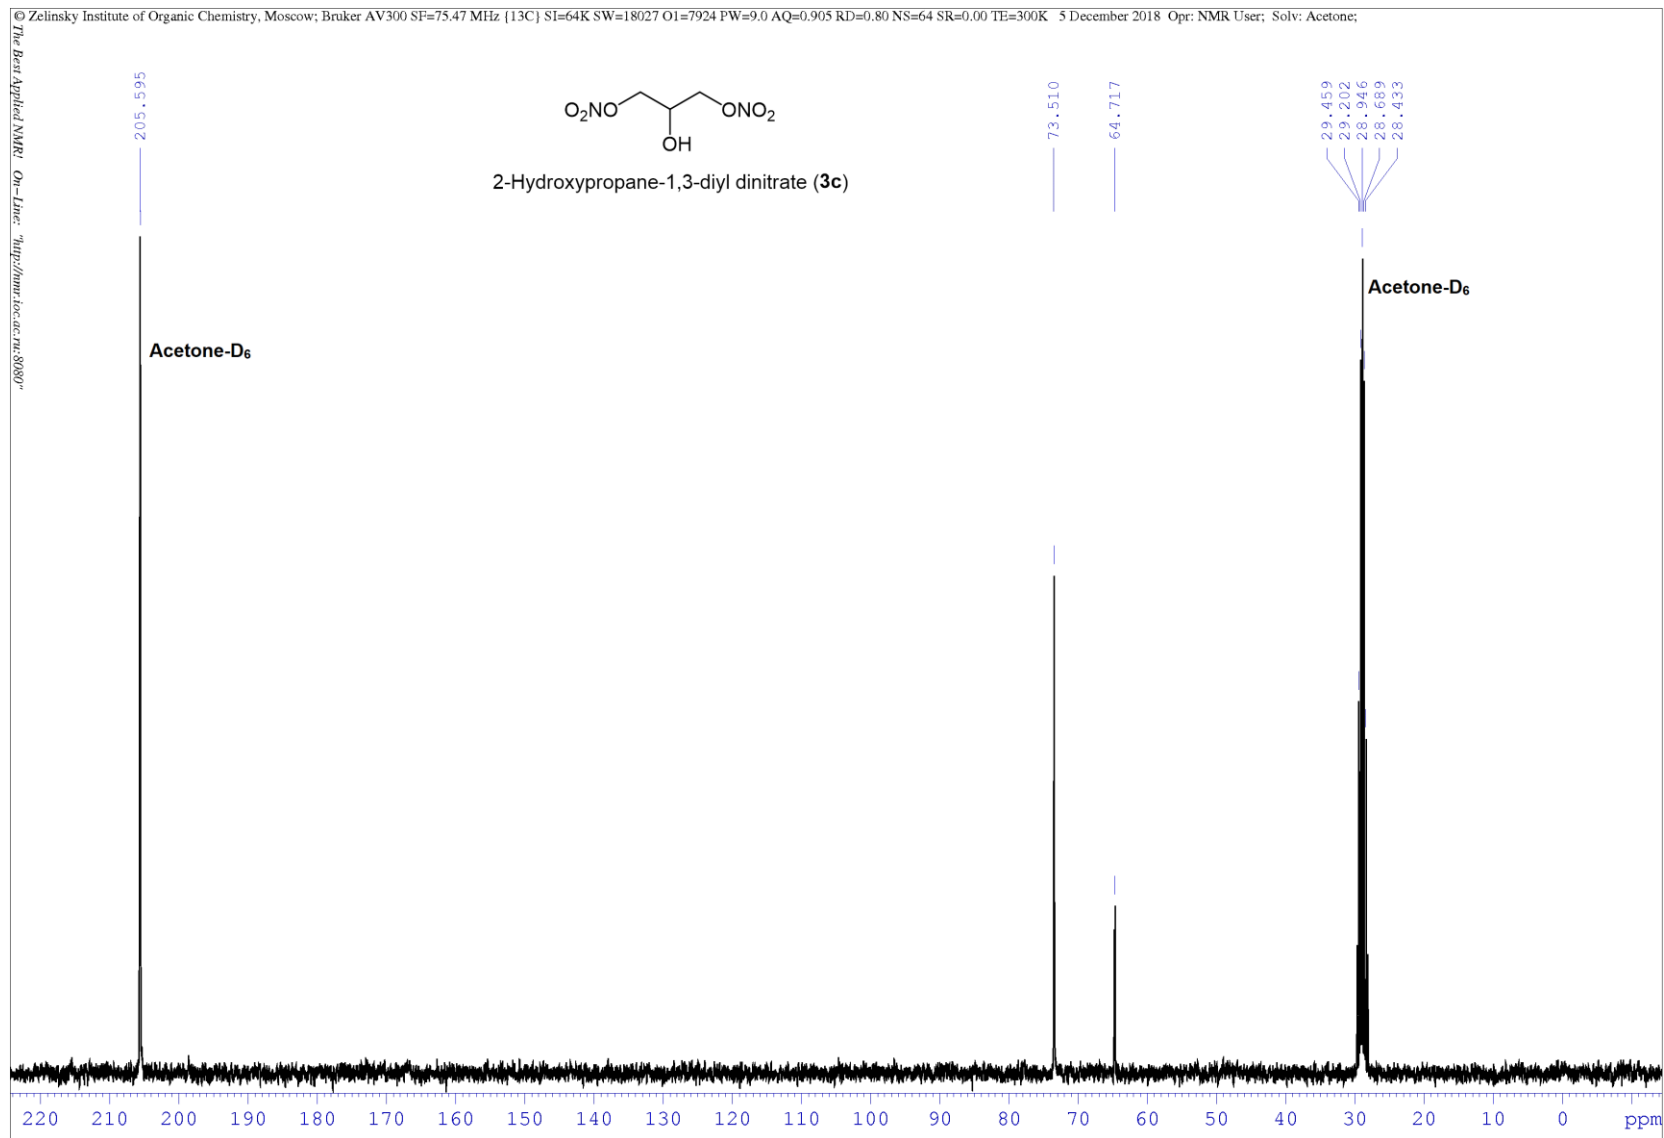

# <sup>1</sup>H NMR spectra of the reaction mixture 2c and 3c

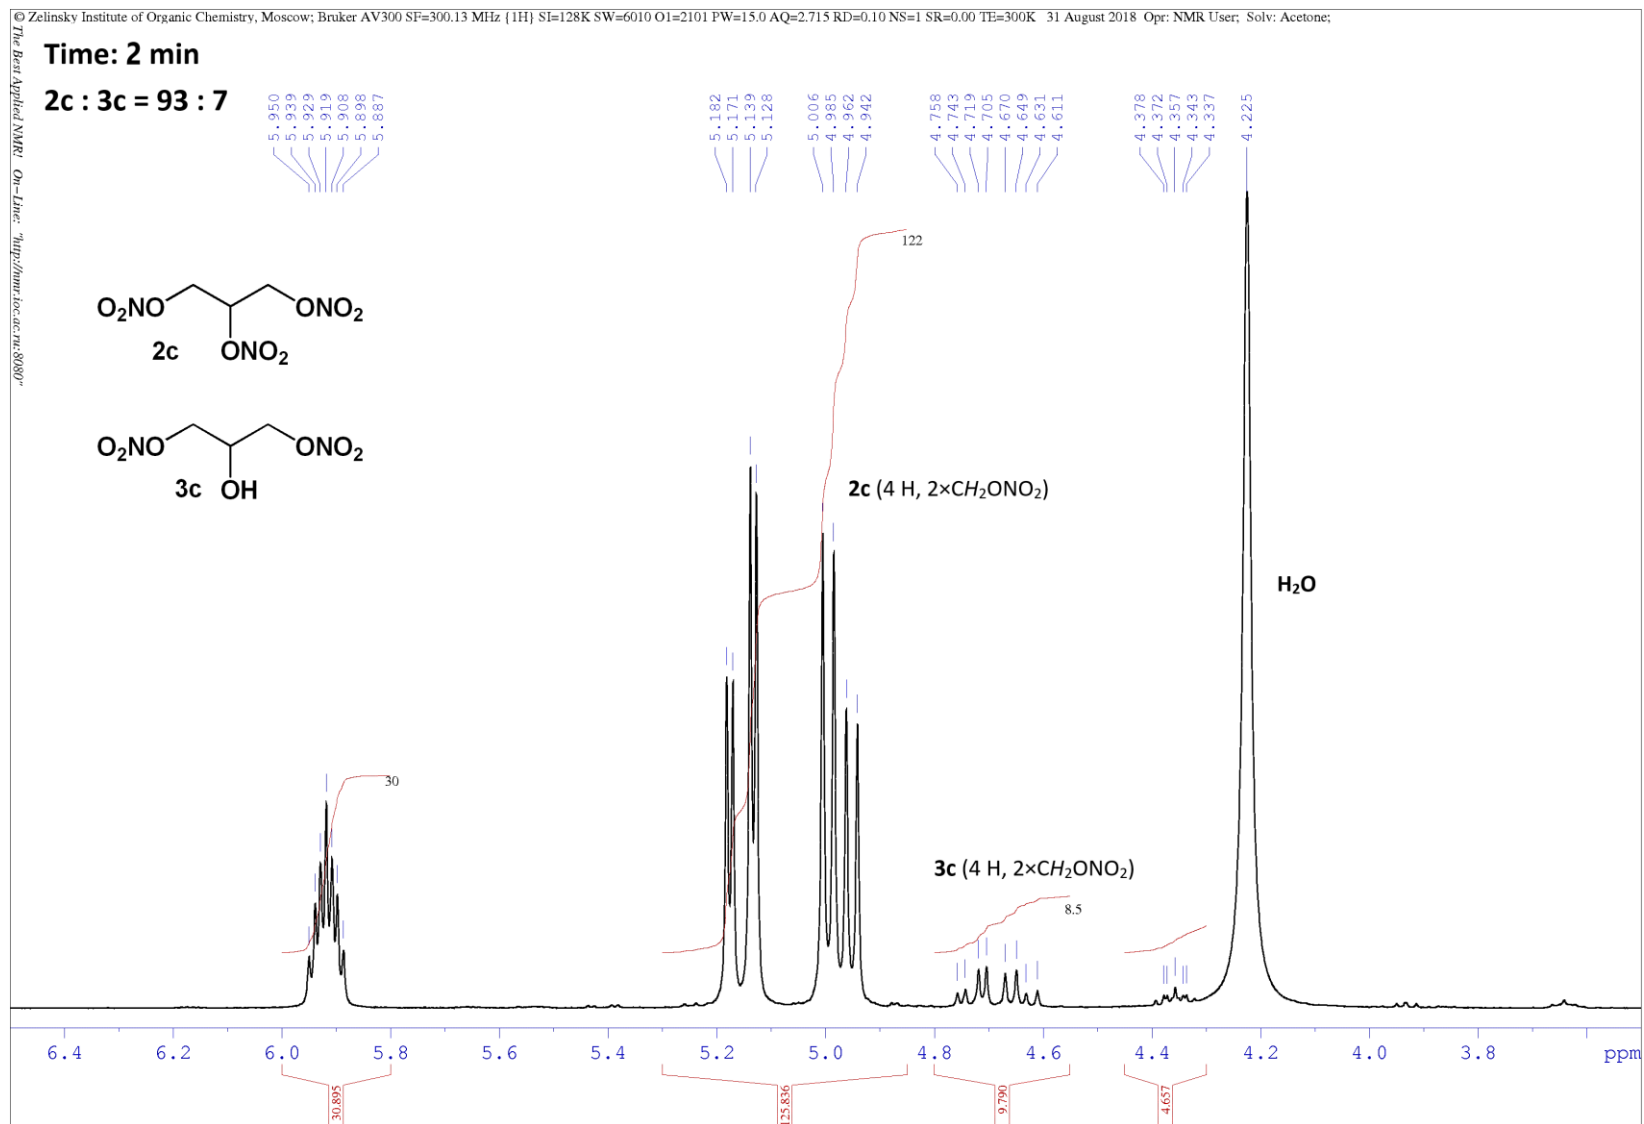

Time: 5 min

2c : 3c = 94 : 6

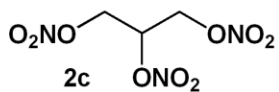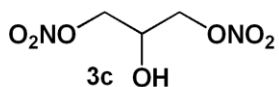

5.945  
5.933  
5.924  
5.913  
5.902  
5.893  
5.881

5.176  
5.165  
5.133  
5.121  
4.999  
4.979  
4.956  
4.935

4.738  
4.714  
4.699  
4.662  
4.642

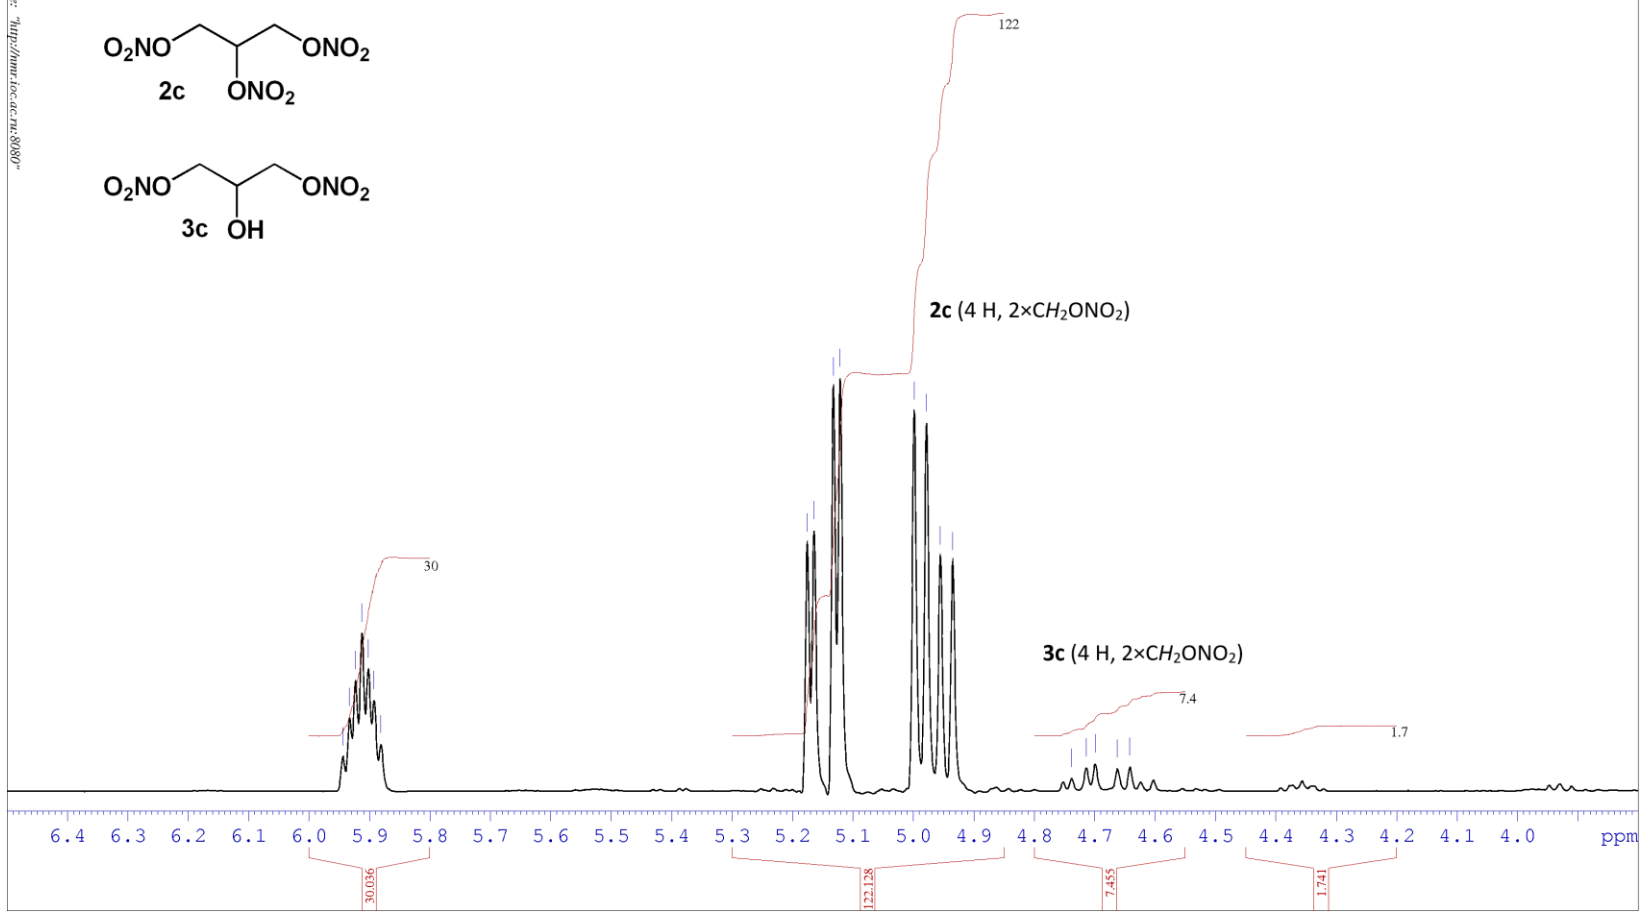

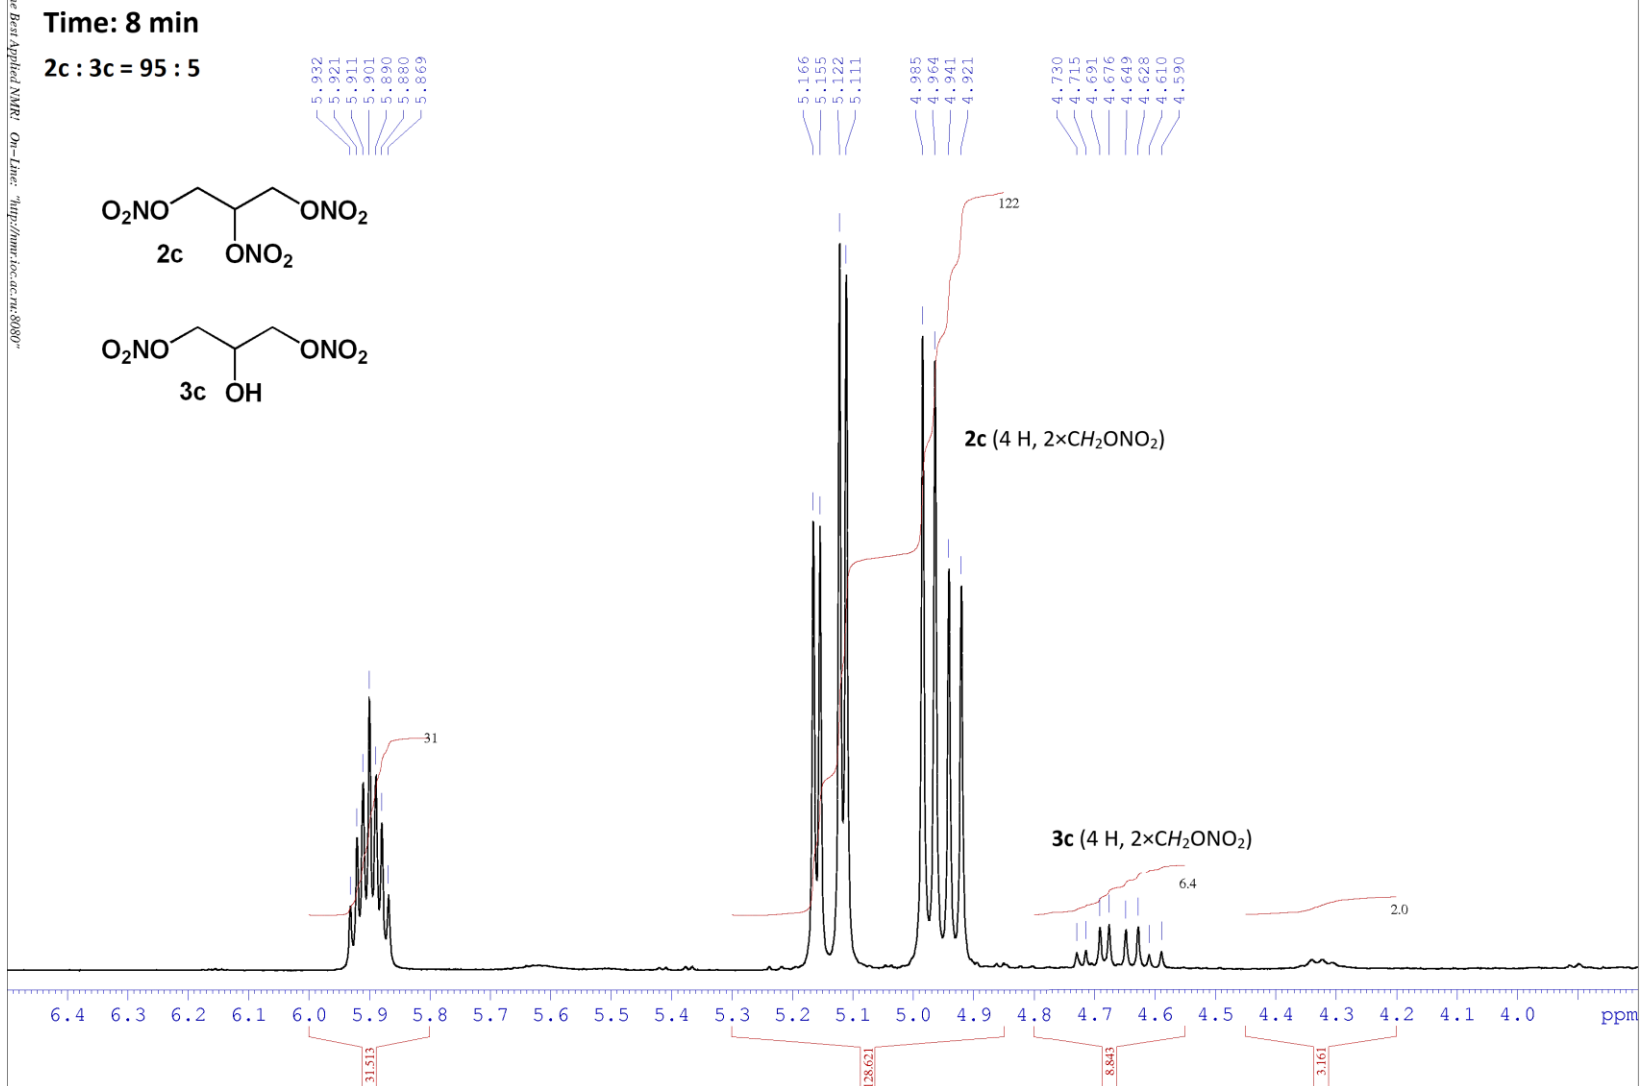

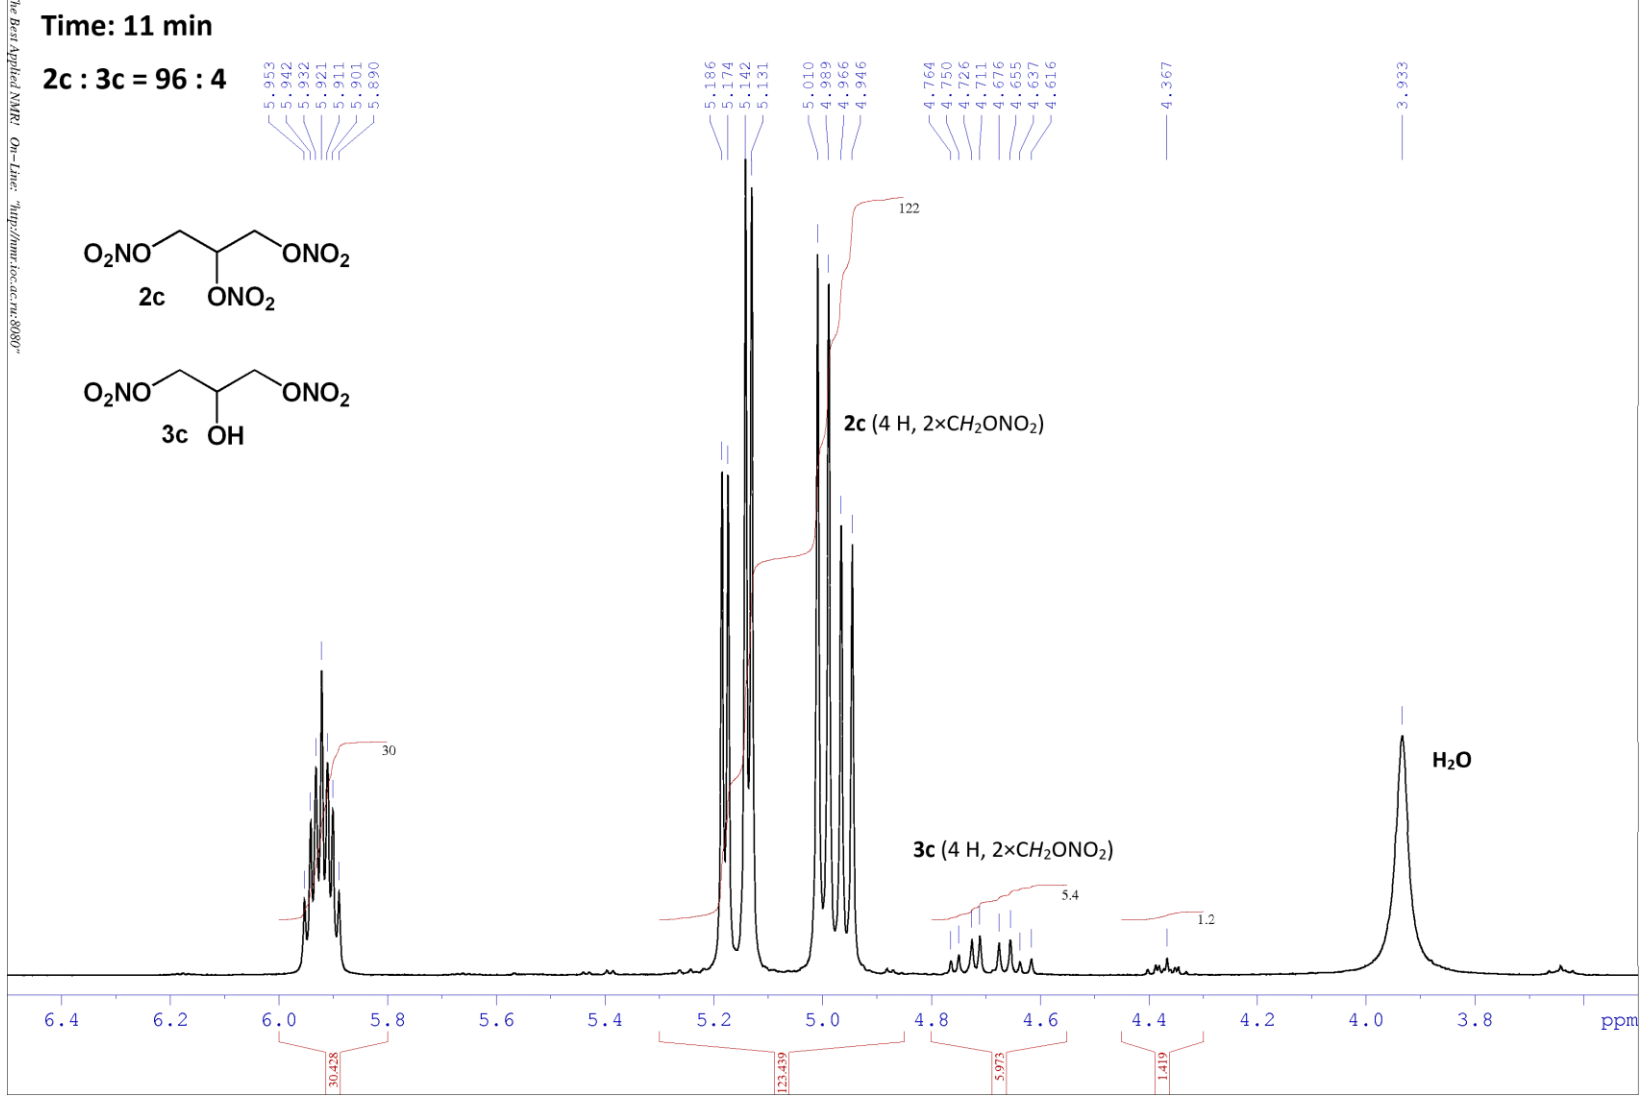

The Best Applied NMR! On-Line: <http://nmr.ioc.ac.ru:8080/>

Time: 14 min

2c : 3c = 93 : 7

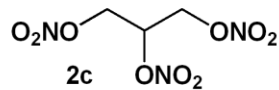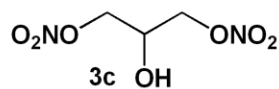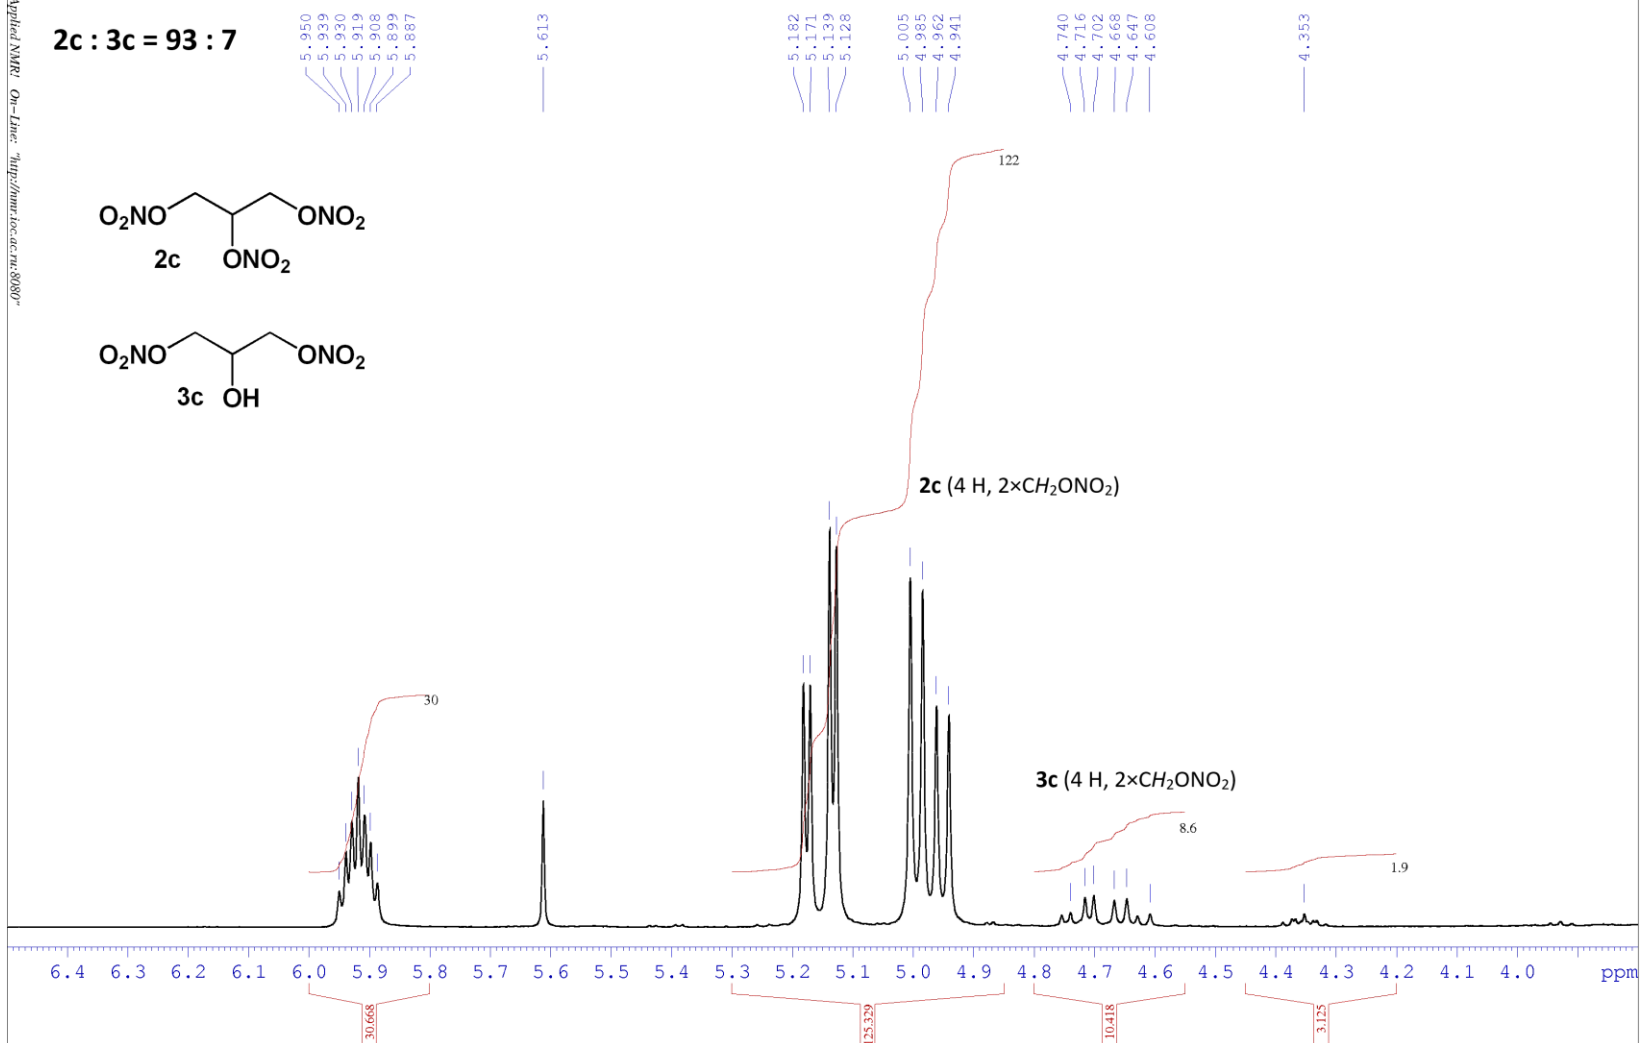

## 7. IR spectra of compounds 2a, 2b, 2c and 3c

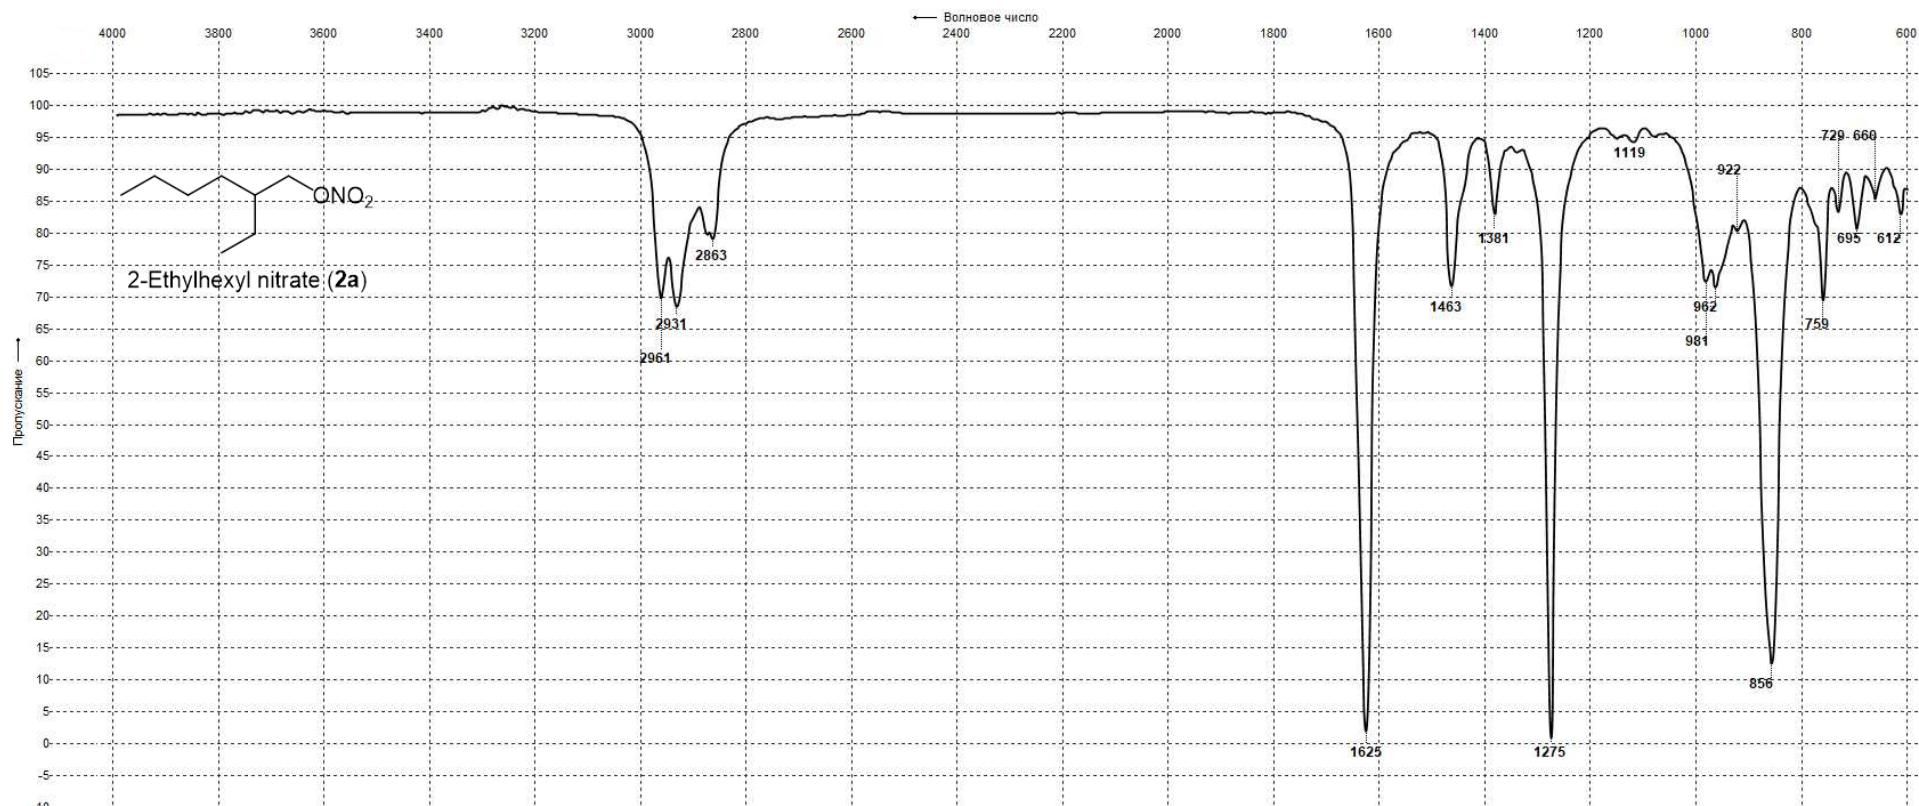



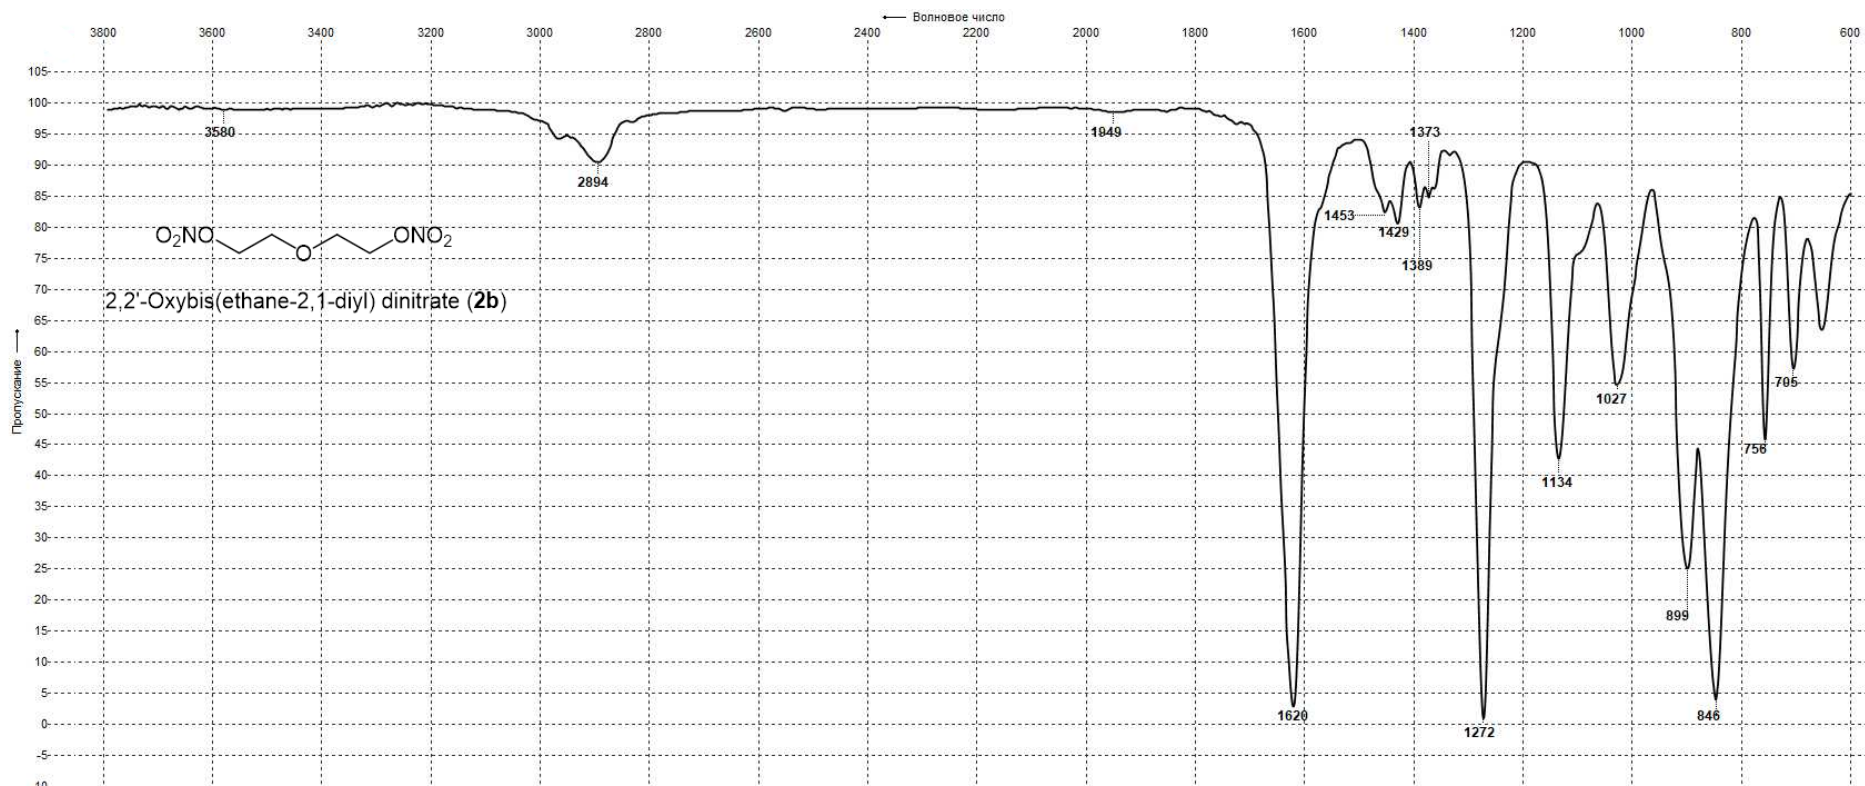

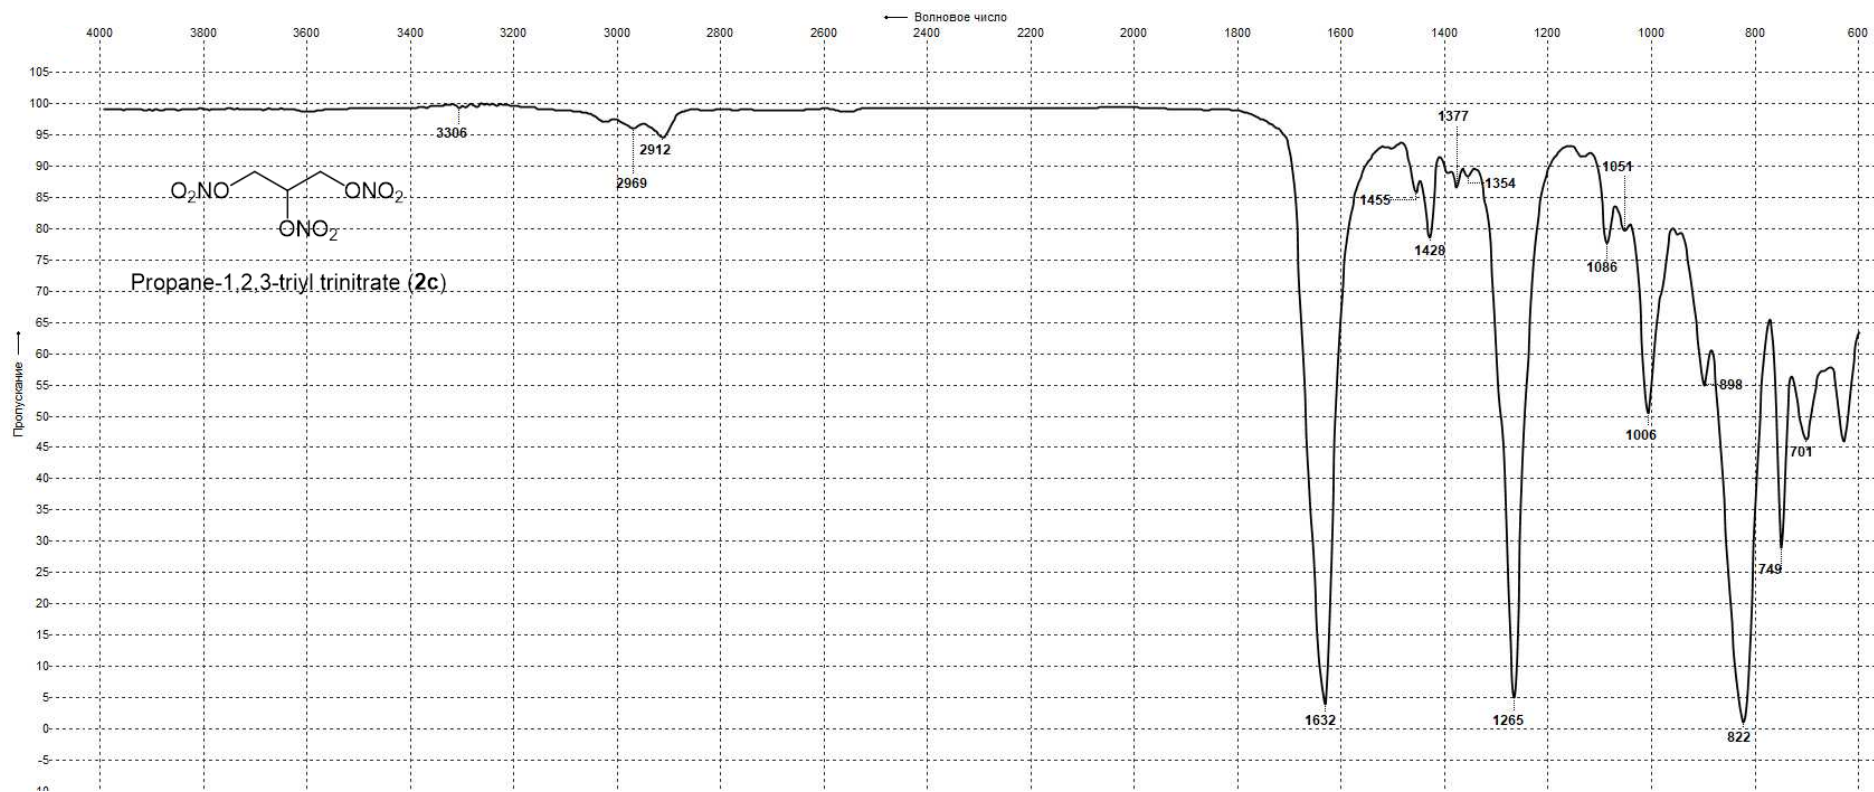

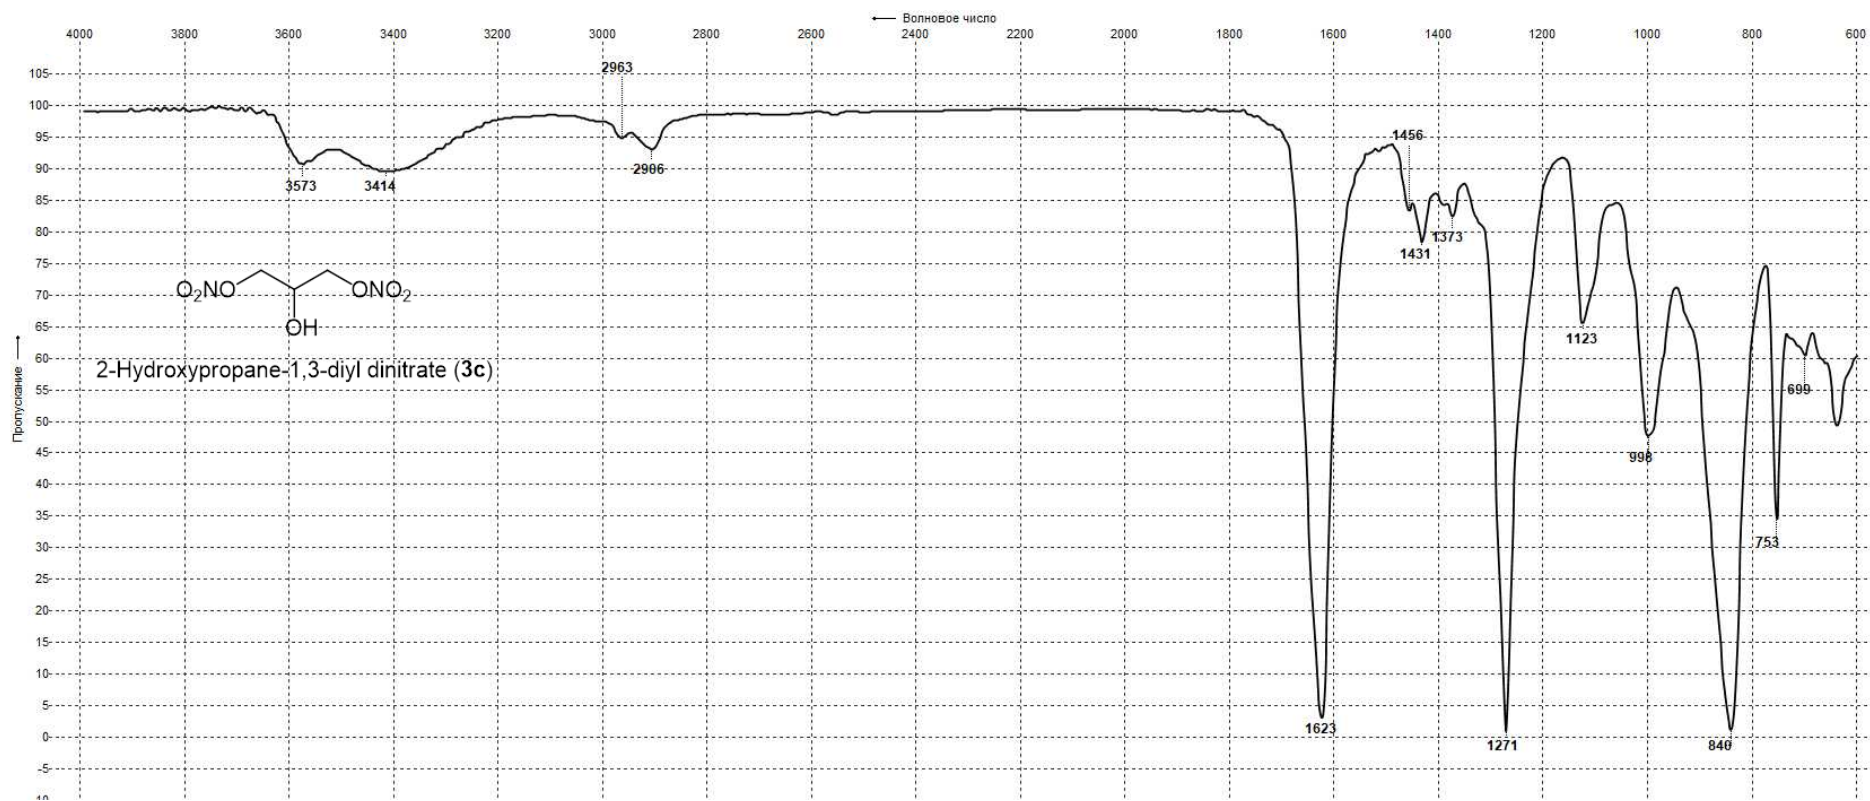

Supplement: c9re00035f1.pdf [file c9re00035f1.pdf]
